# Supplementary material for: Correlation of mRNA and protein levels: Cell type-specific gene expression of cluster designation antigens in the prostate
Source: PubMed Central journal article supplement (PMC2413246; doi:10.1186/1471-2164-9-246), 2008-05-23

**Endothelial\_CD31 , median**  
**spearman = 0.25 , pearson = 0.28**

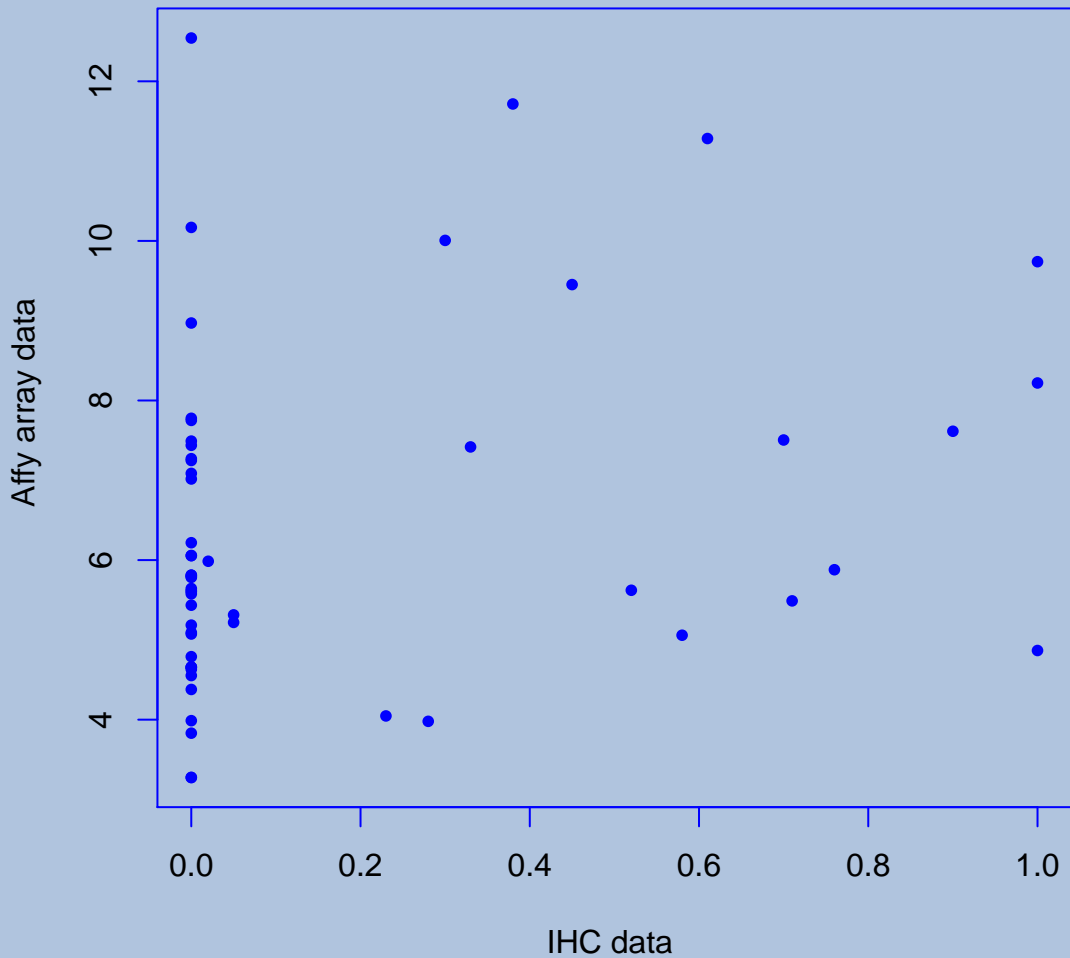

**Endothelial\_CD31 , mean**  
**spearman = 0.26 , pearson = 0.28**

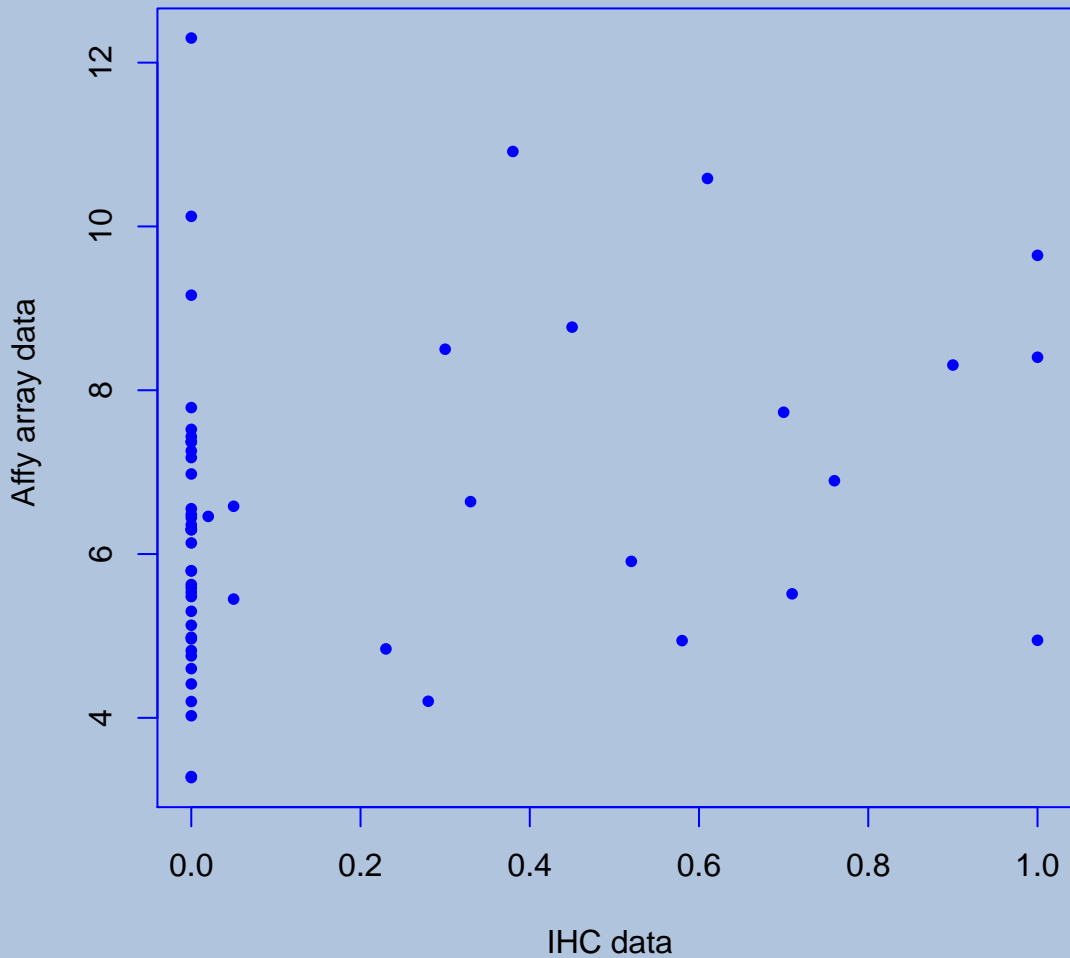

**Endothelial\_CD31 , no\_zeros**  
**spearman = 0.31 , pearson = 0.26**

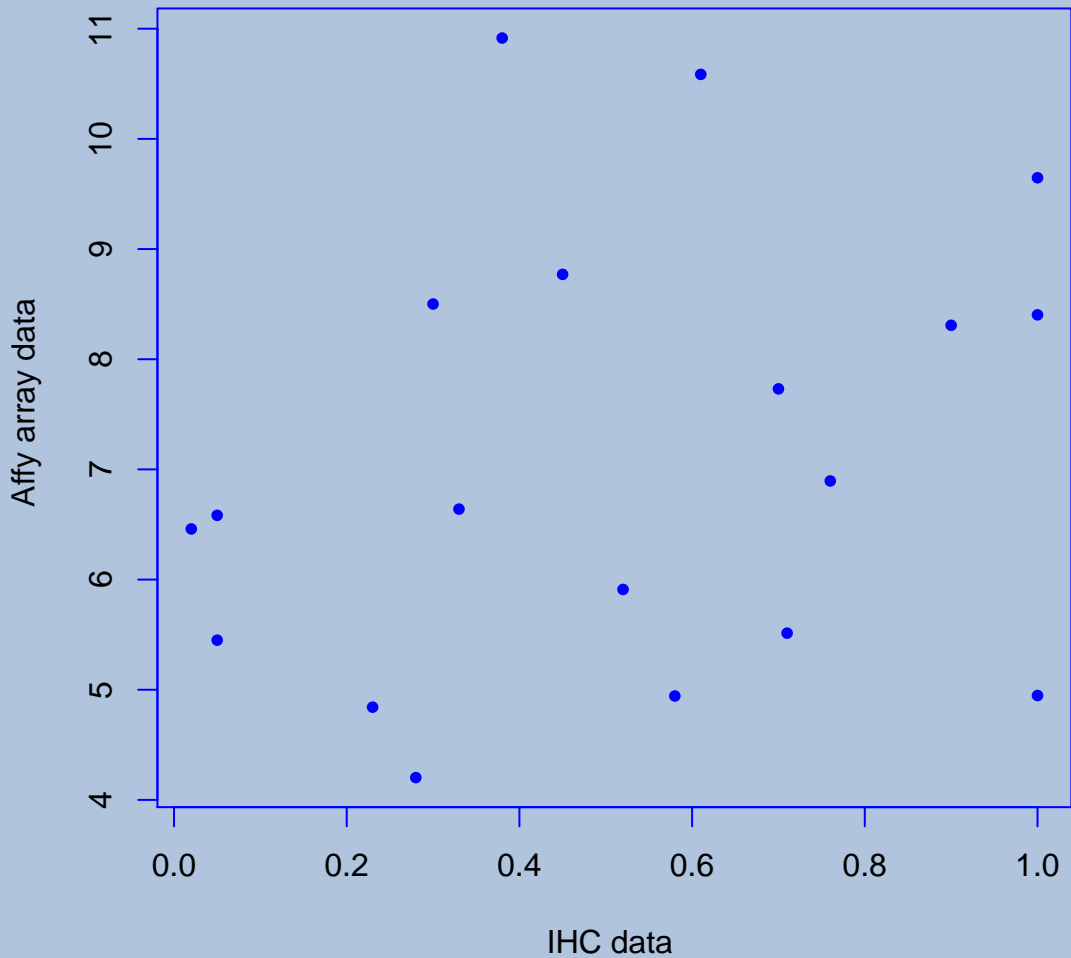

**Endothelial\_CD31 , xform**  
**spearman = 0.27 , pearson = 0.27**

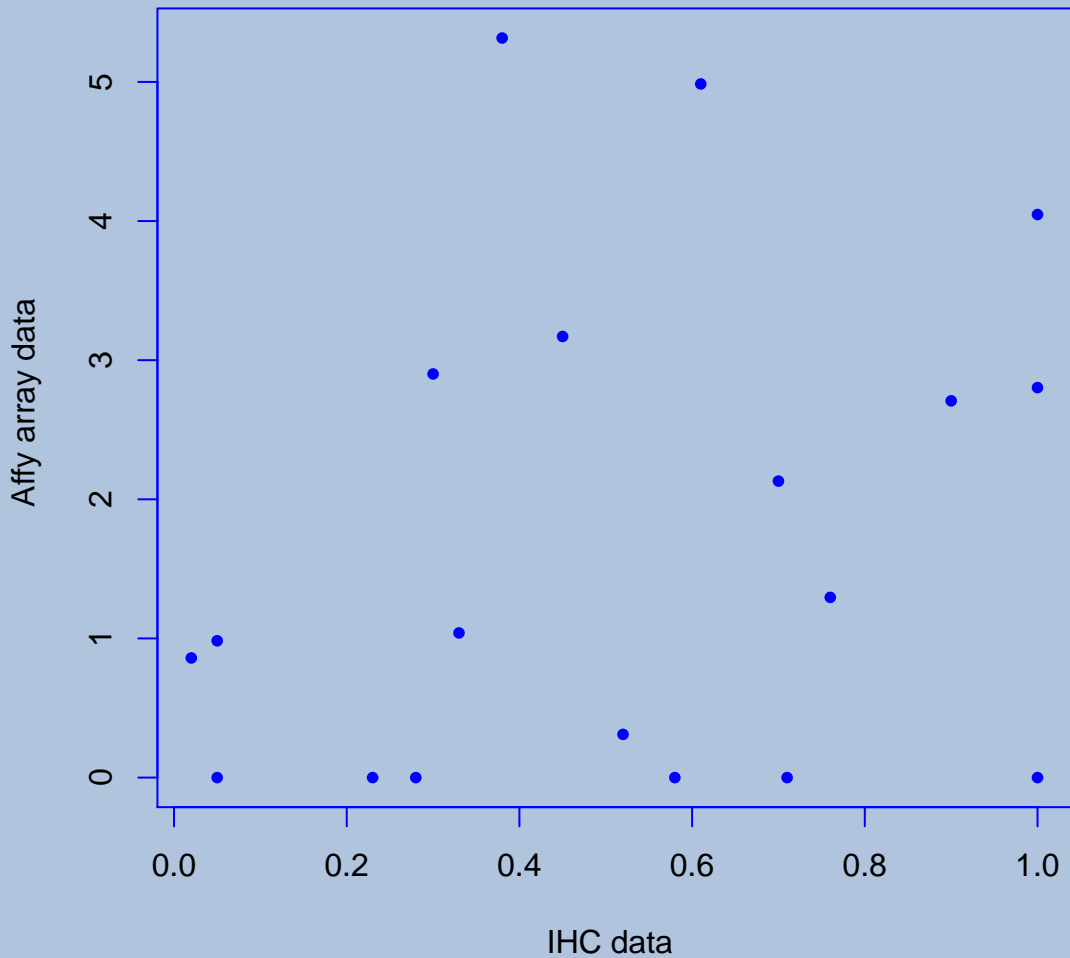

Endothelial\_CD31 , min  
spearman = 0.14 , pearson = 0.20

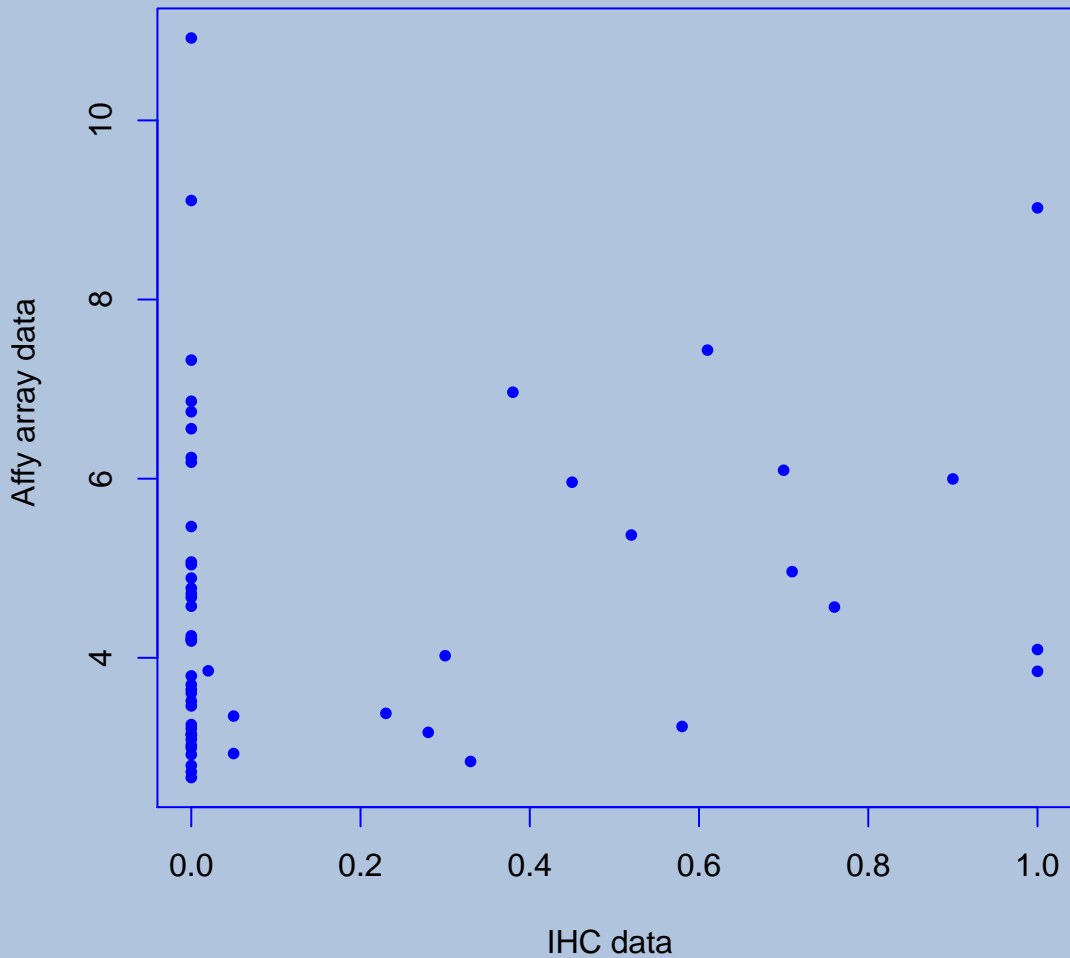

Endothelial\_CD31 , max  
spearman = 0.22 , pearson = 0.19

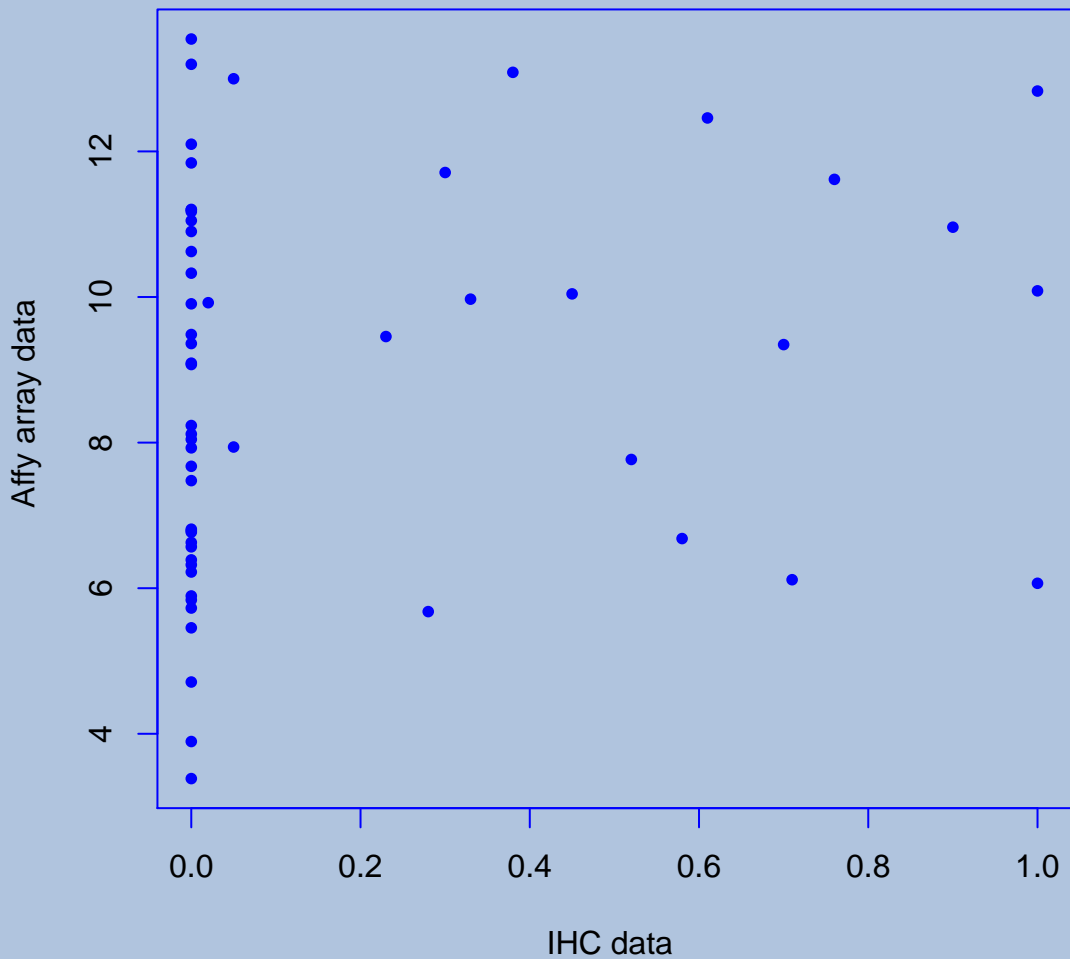

**Endothelial\_CD31 , digitized**  
**spearman = 0.08 , pearson = 0.08**

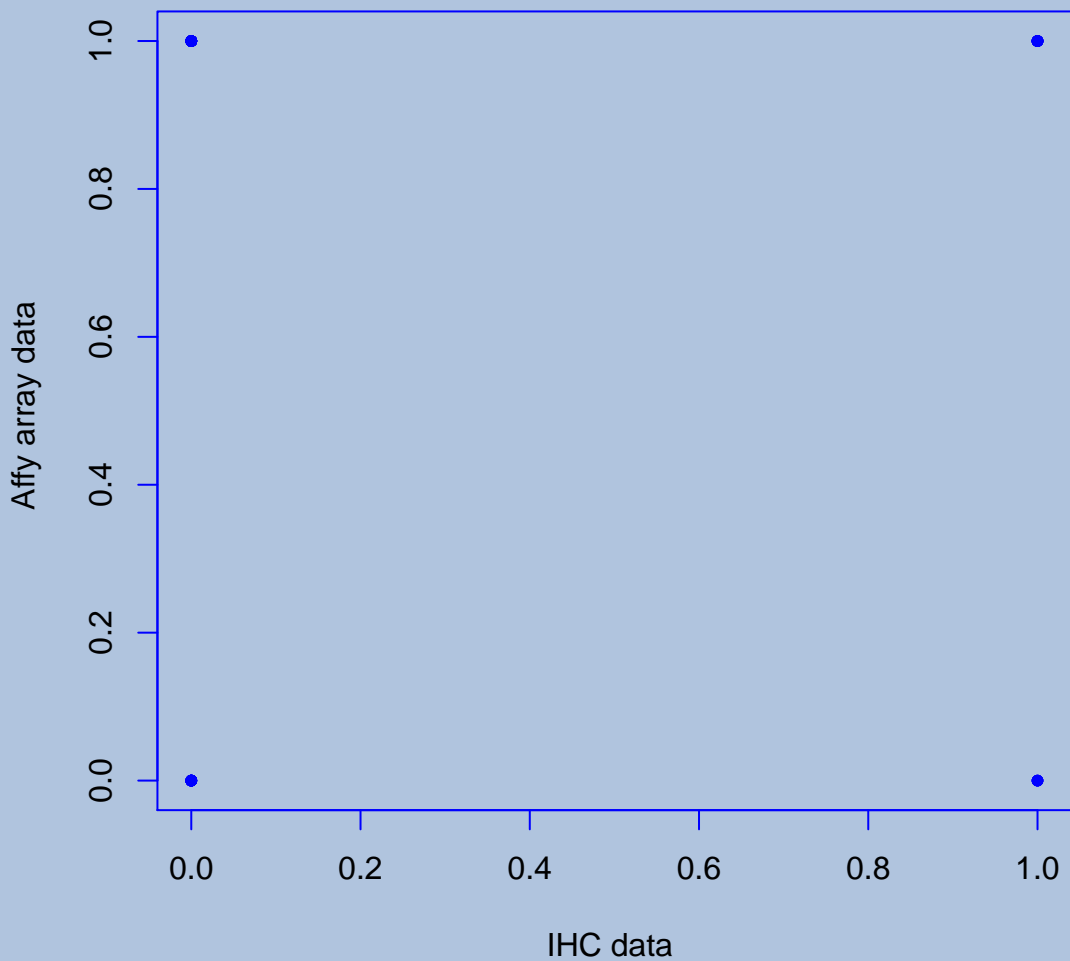

# Endothelial\_CD31

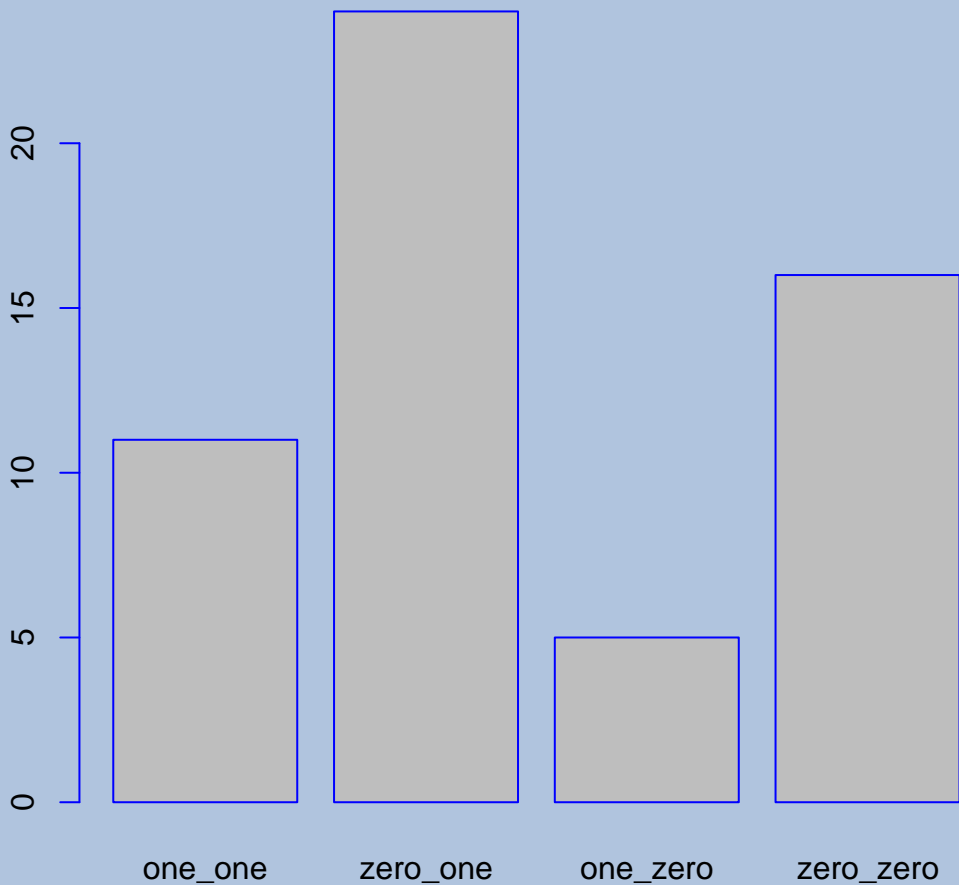



Luminal\_CD26 , median  
spearman = 0.46 , pearson = 0.47

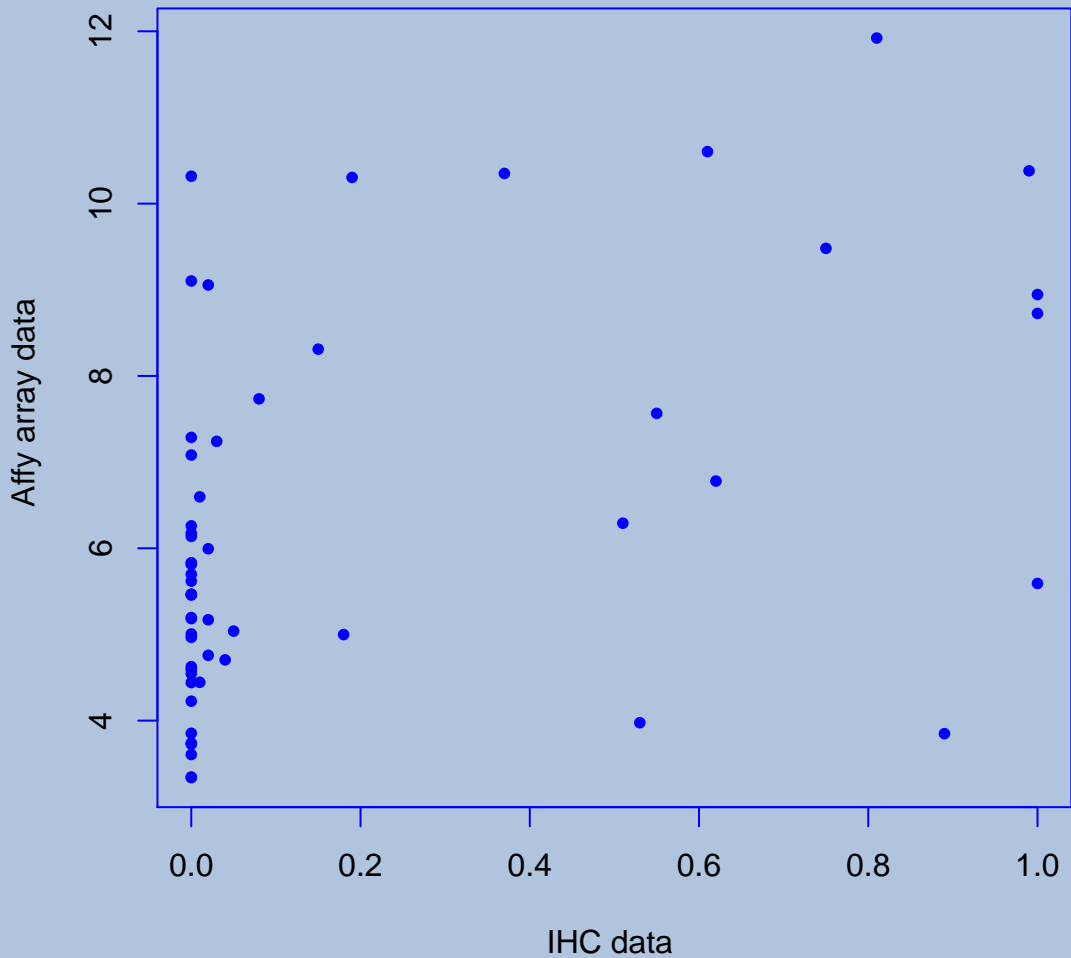

**Luminal\_CD26 , mean**  
**spearman = 0.51 , pearson = 0.55**

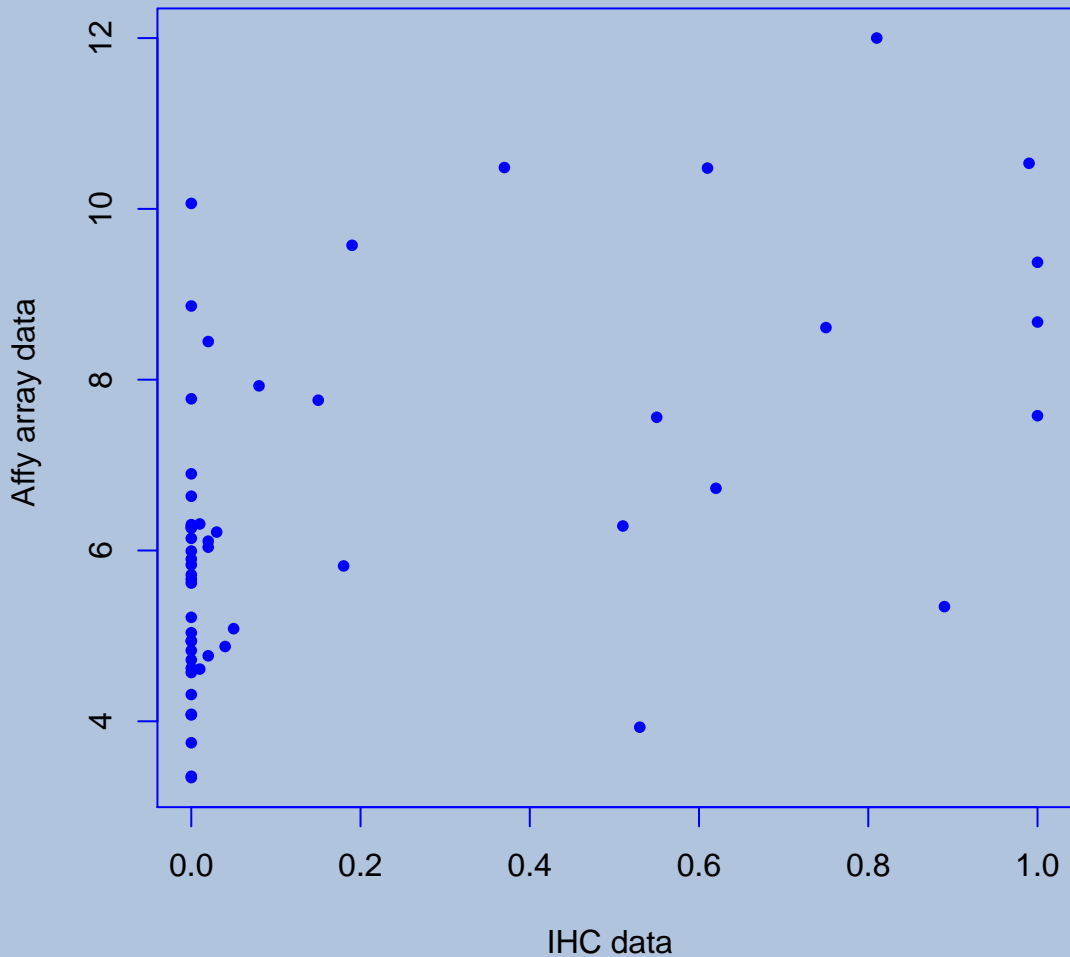

**Luminal\_CD26 , no\_zeros**  
**spearman = 0.52 , pearson = 0.49**

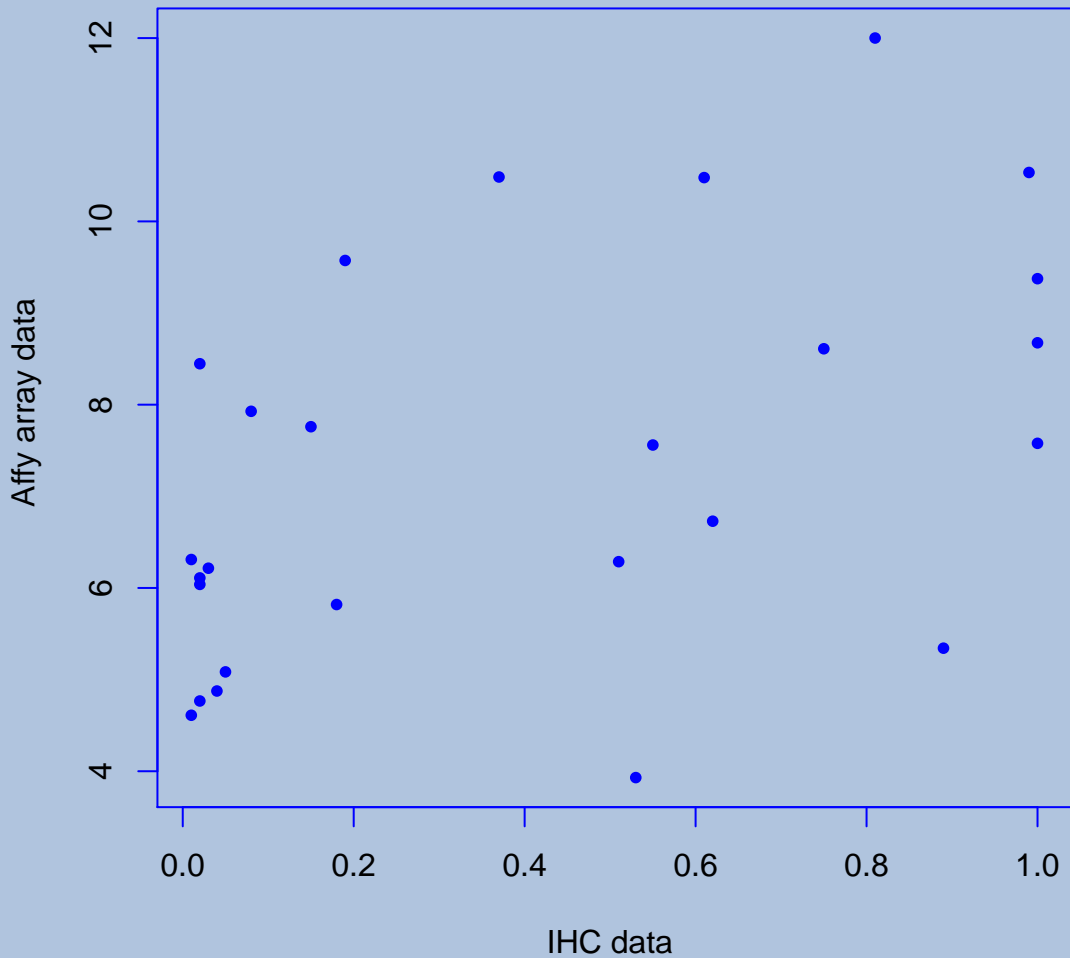

Luminal\_CD26 , xform  
spearman = 0.51 , pearson = 0.50

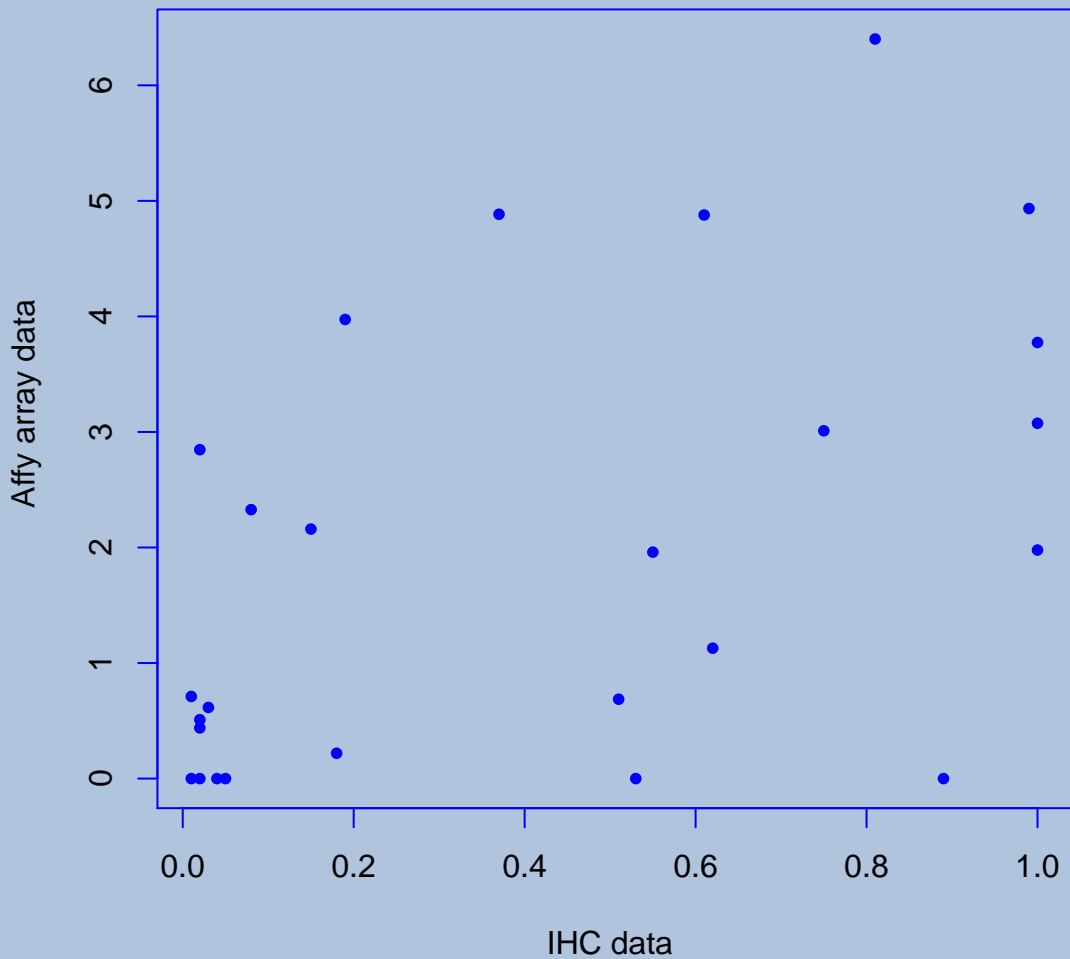

Luminal\_CD26 , min  
spearman = 0.16 , pearson = 0.43

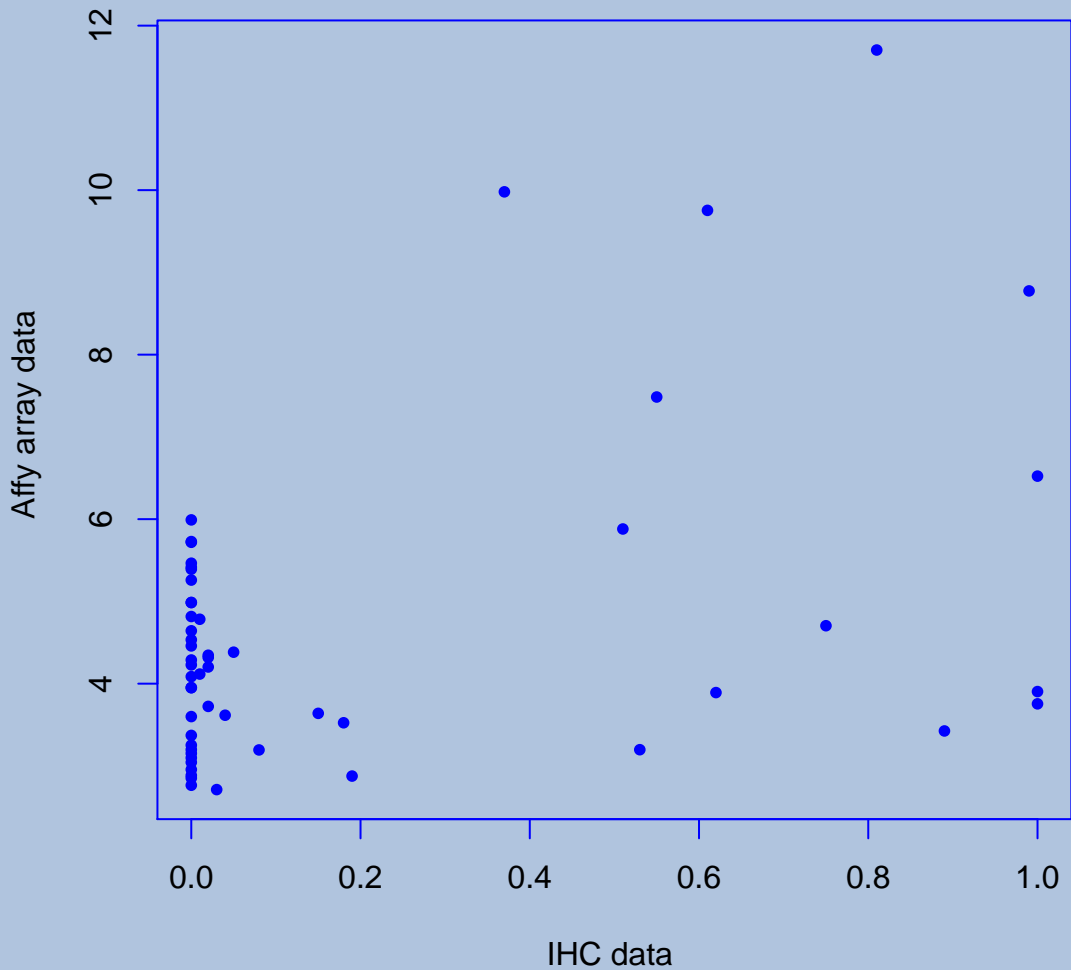

Luminal\_CD26 , max  
spearman = 0.51 , pearson = 0.48

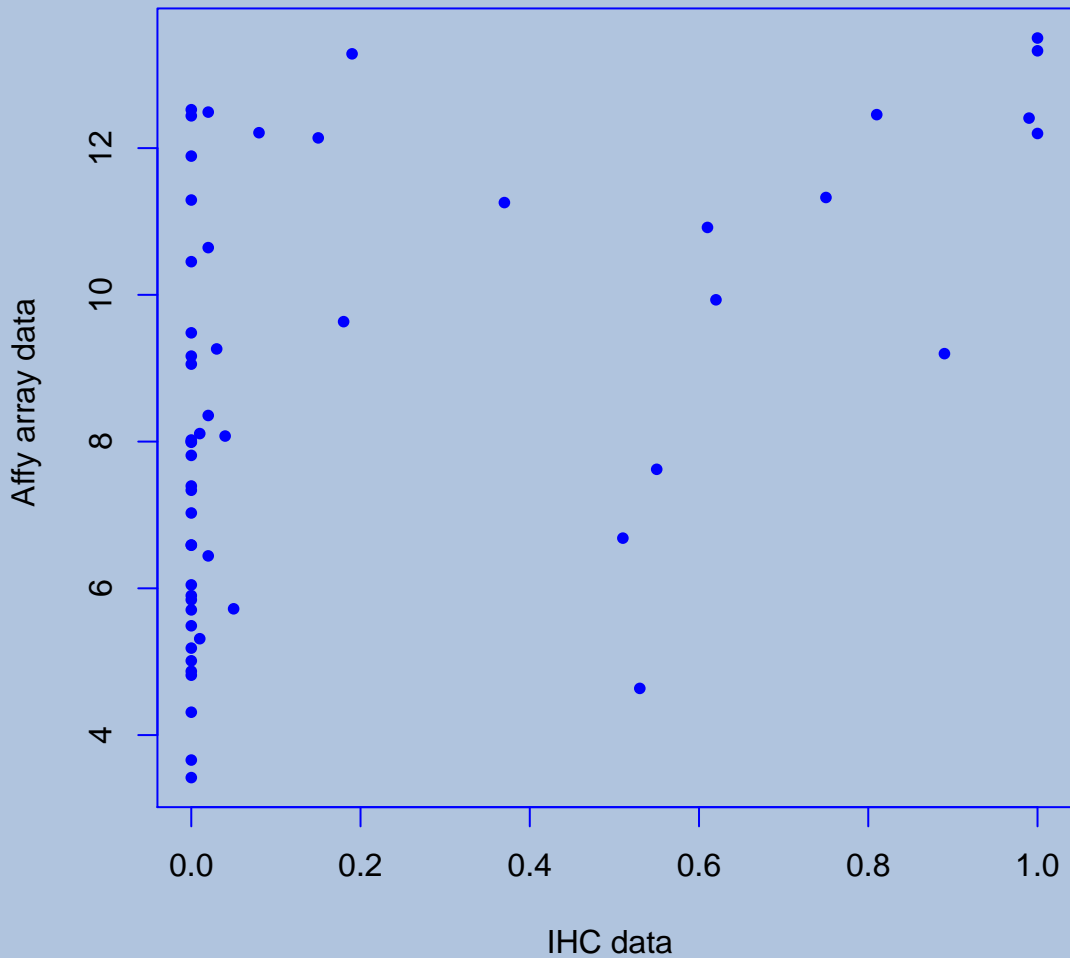

**Luminal\_CD26 , digitized**  
**spearman = 0.24 , pearson = 0.24**

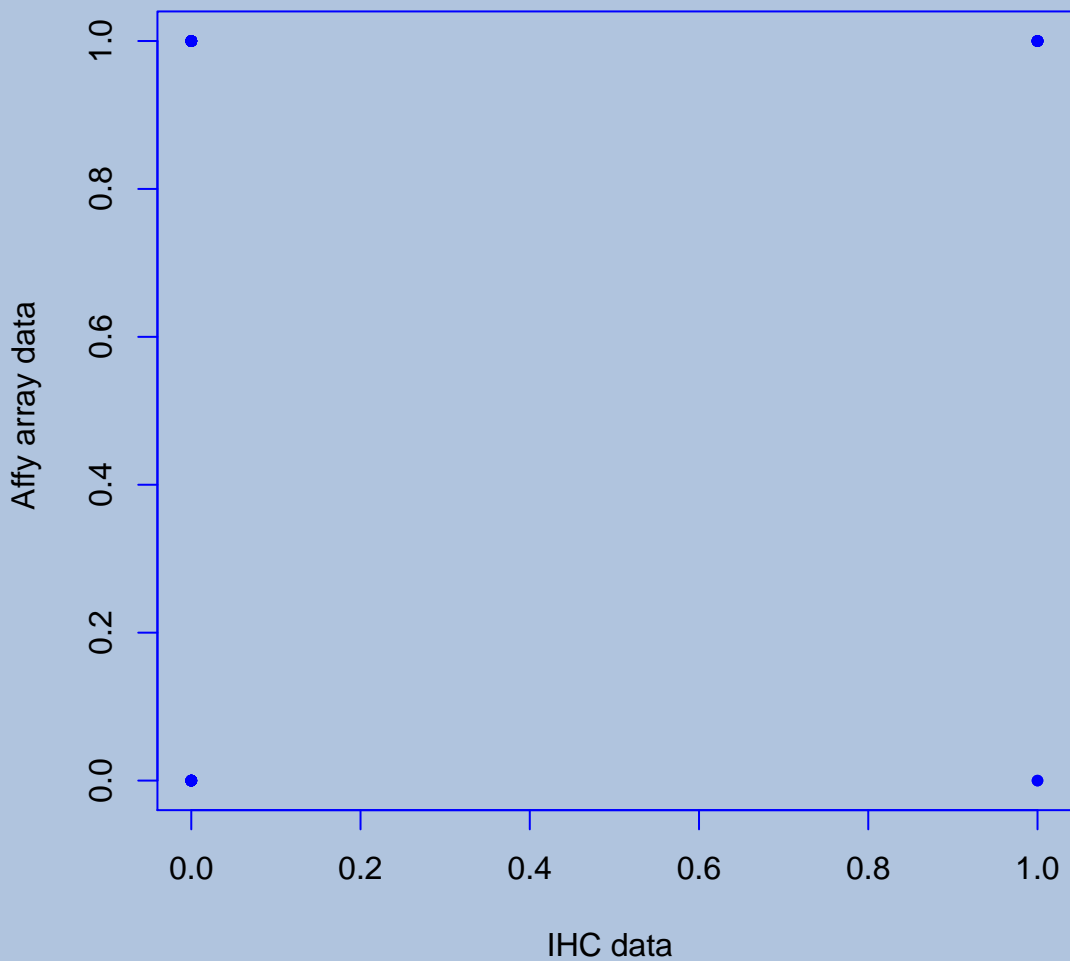

# Luminal\_CD26

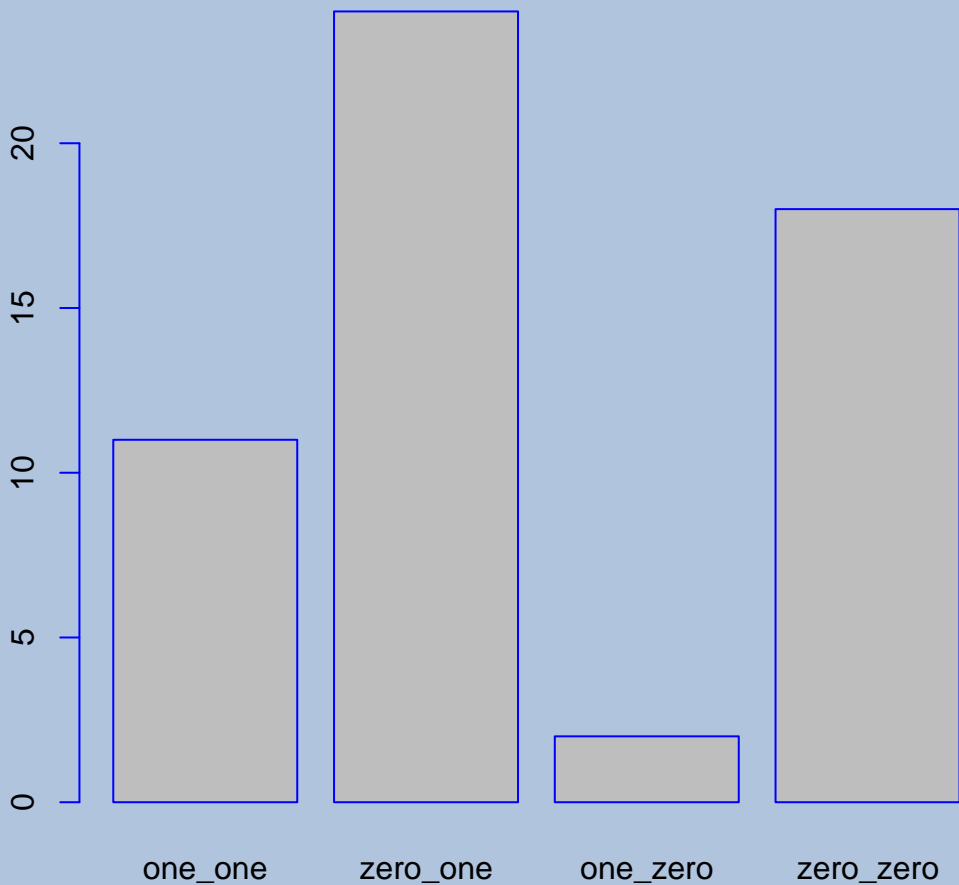



**Stromal\_CD49a , median**  
**spearman = -0.00 , pearson = -0.01**

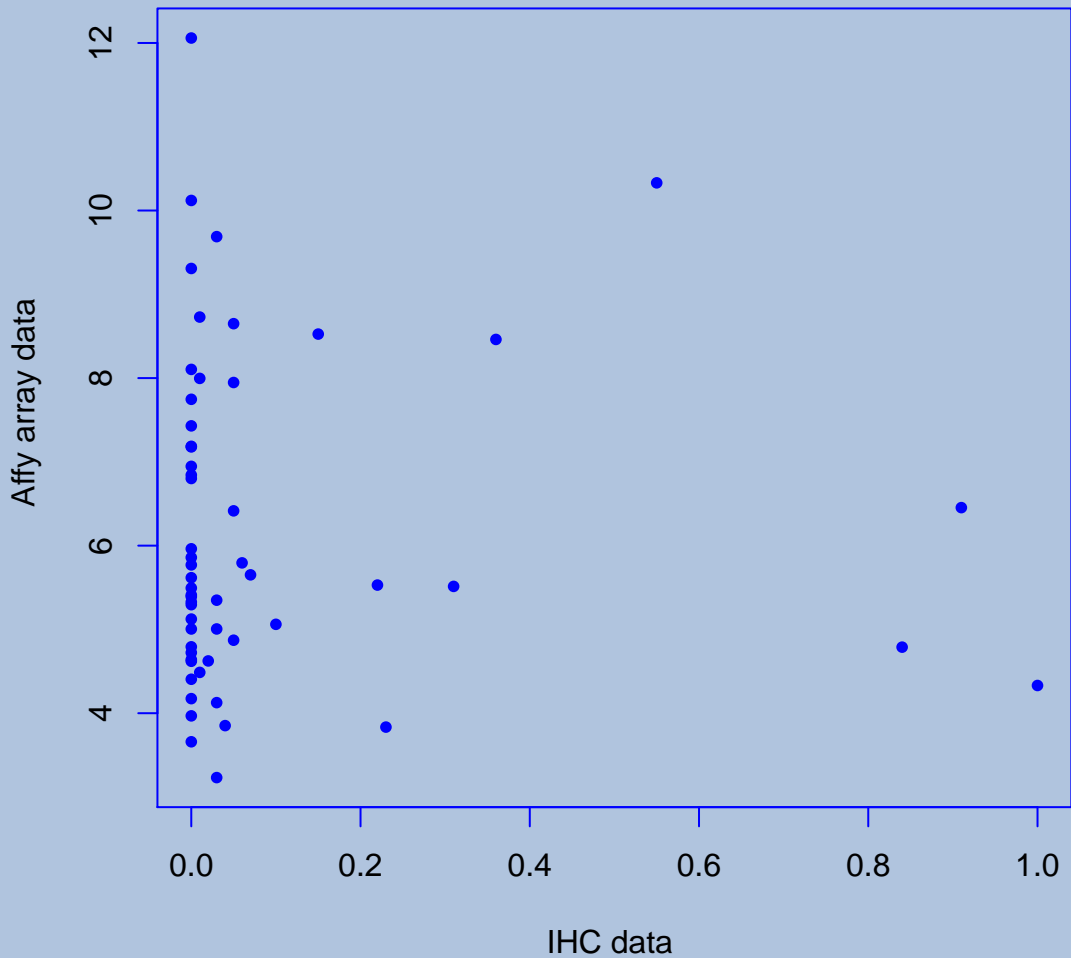

**Stromal\_CD49a , mean**  
**spearman = 0.06 , pearson = 0.07**

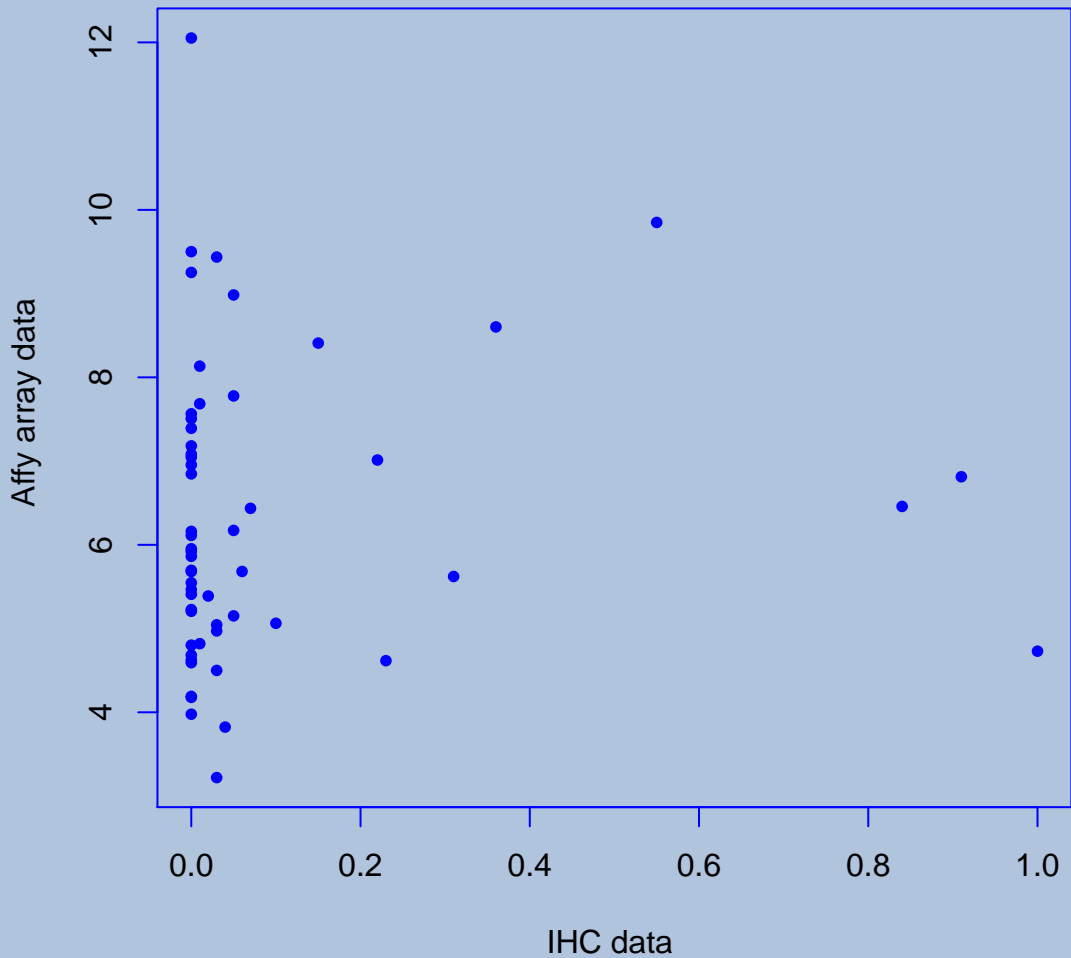

**Stromal\_CD49a , no\_zeros**  
**spearman = 0.19 , pearson = 0.10**

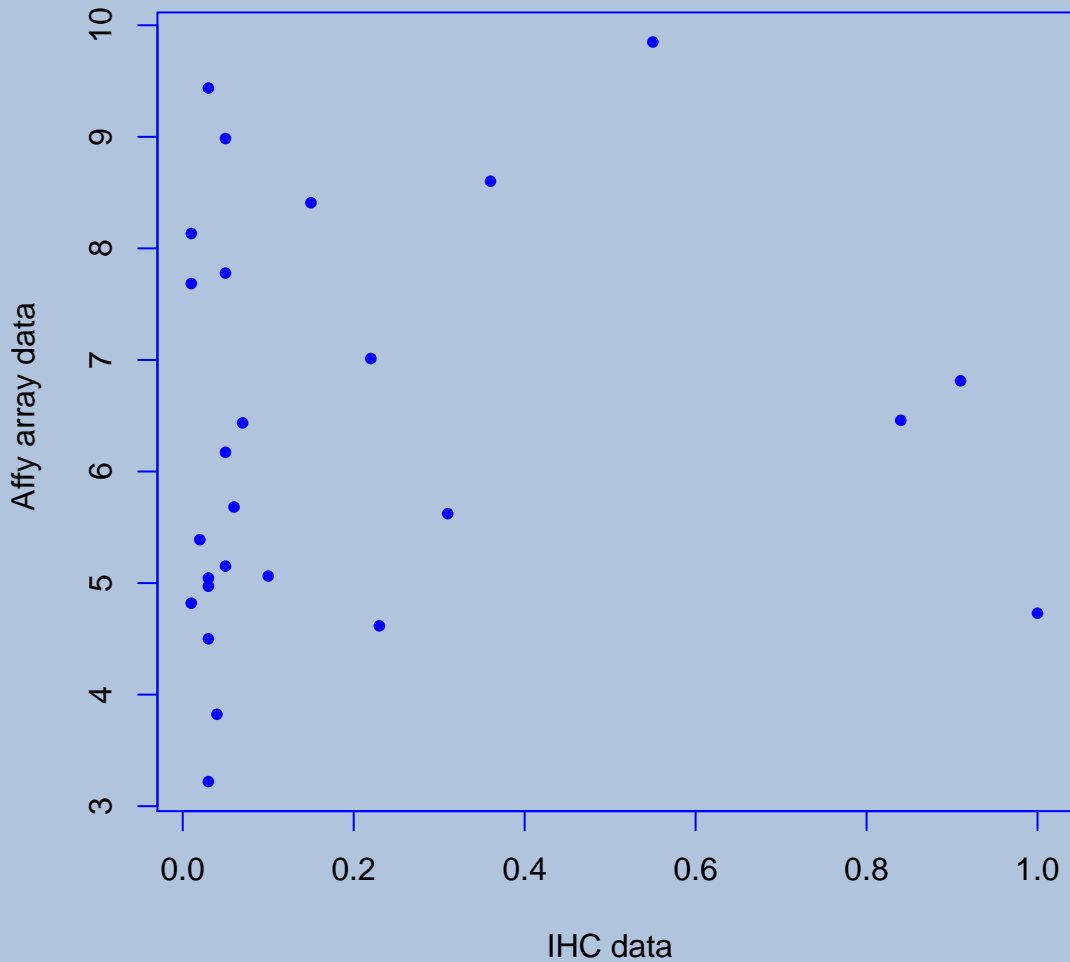

**Stromal\_CD49a , xform**  
**spearman = 0.21 , pearson = 0.06**

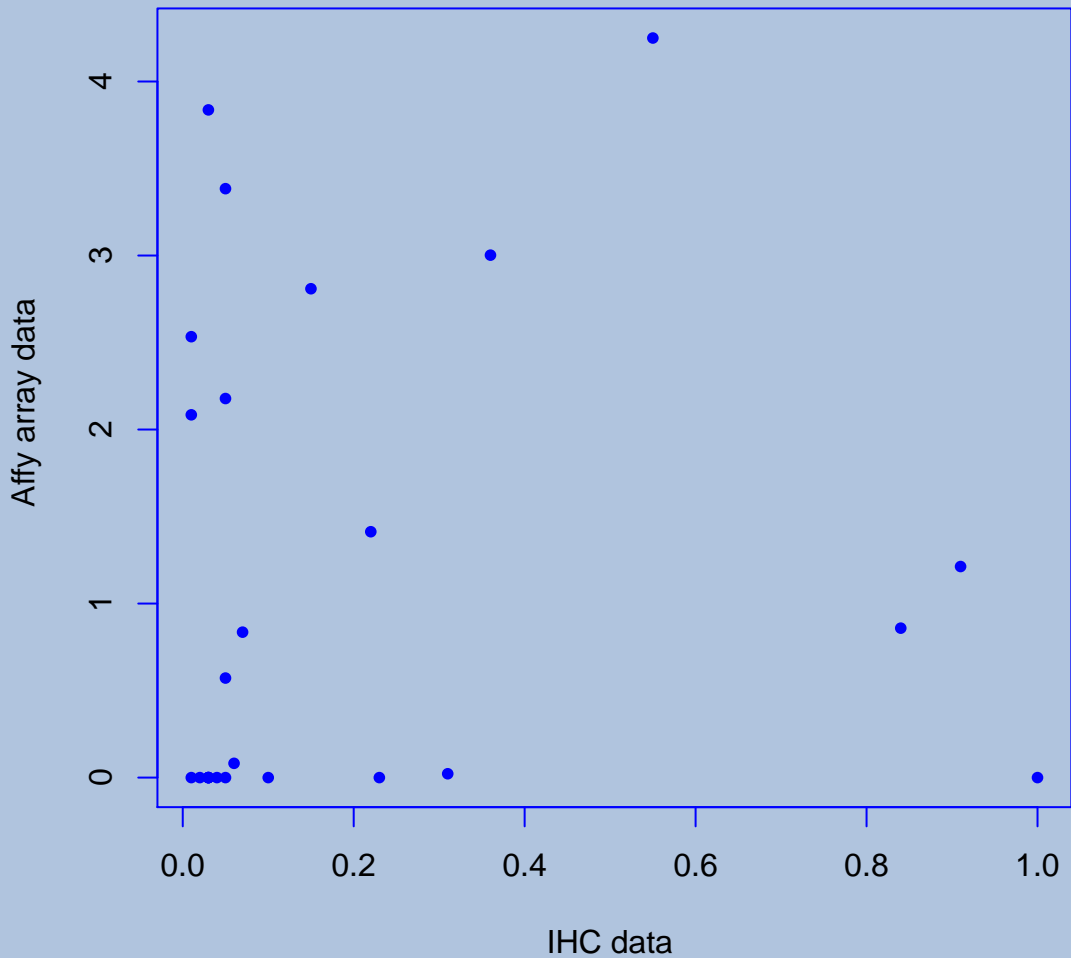

**Stromal\_CD49a , min**  
**spearman = -0.05 , pearson = -0.15**

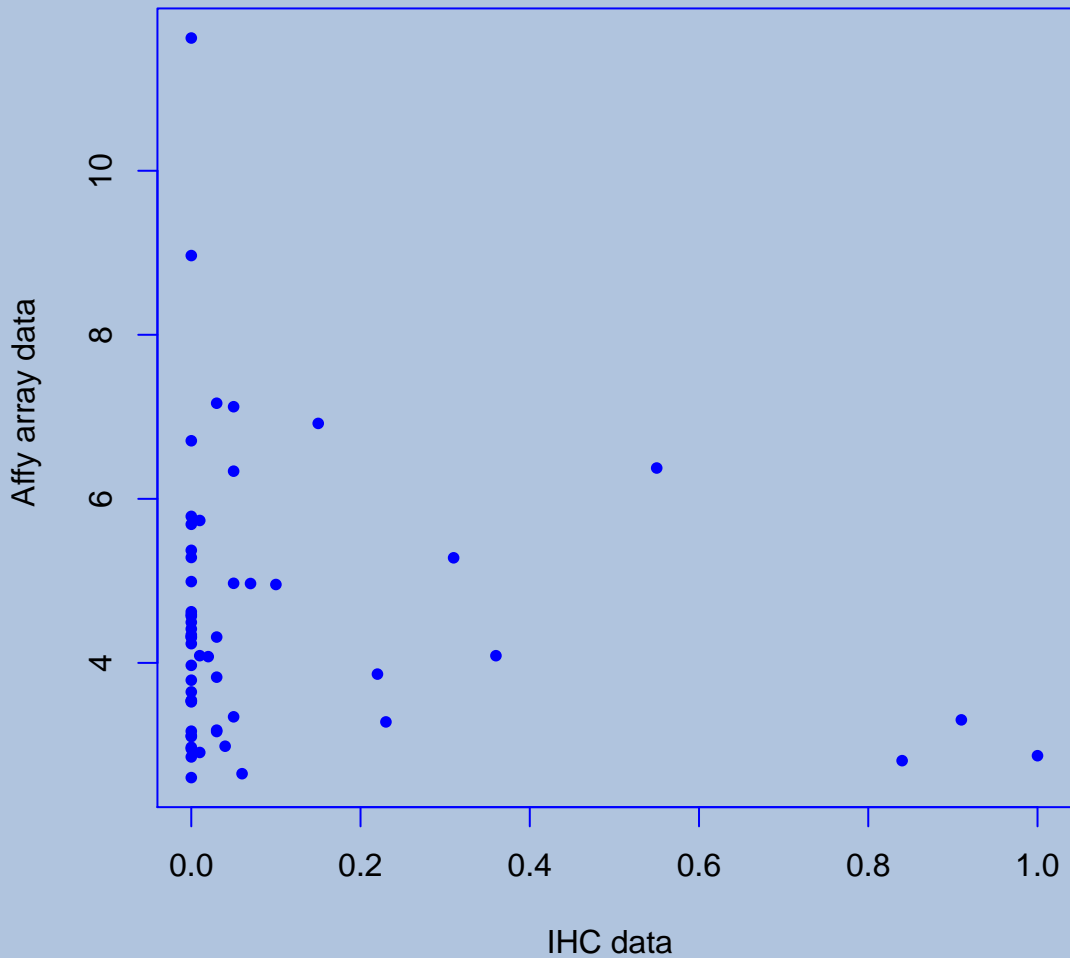

**Stromal\_CD49a , max**  
**spearman = 0.13 , pearson = 0.30**

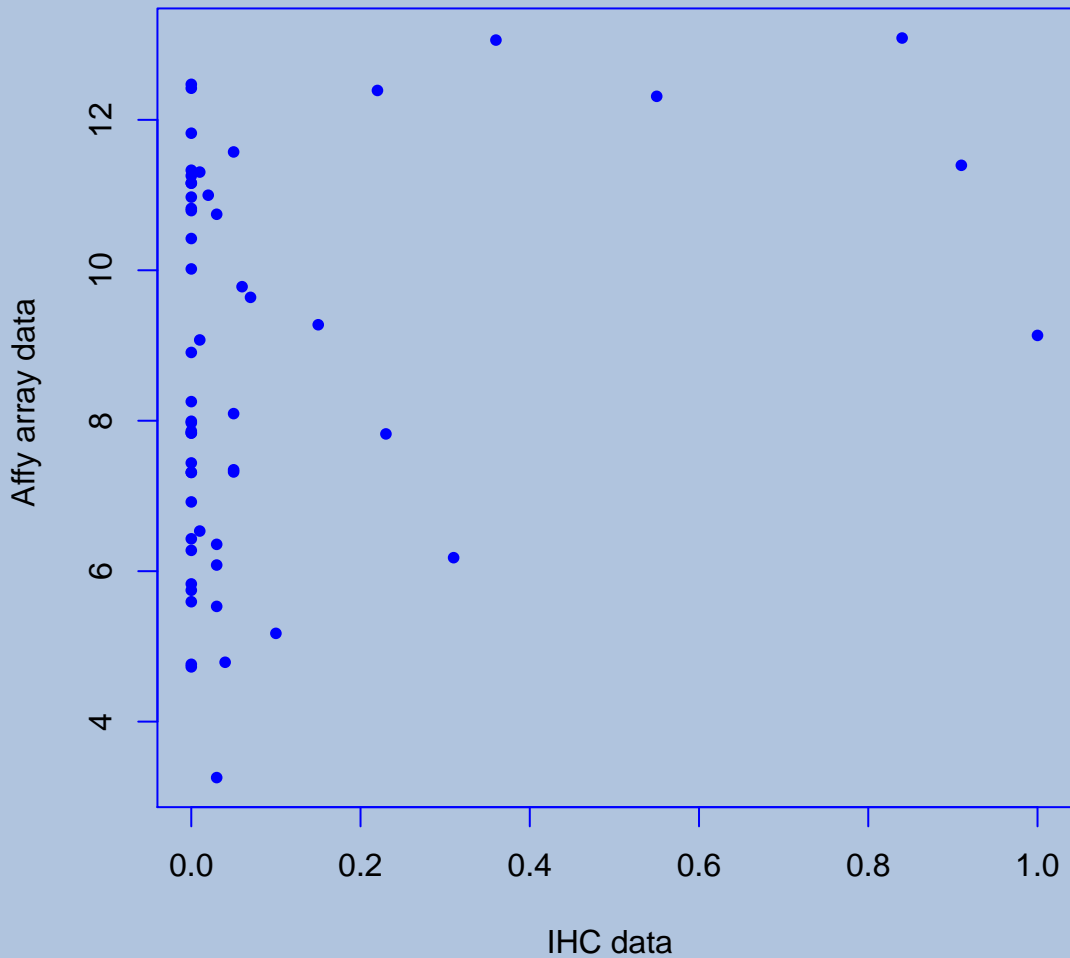

**Stromal\_CD49a , digitized**  
**spearman = 0.13 , pearson = 0.13**

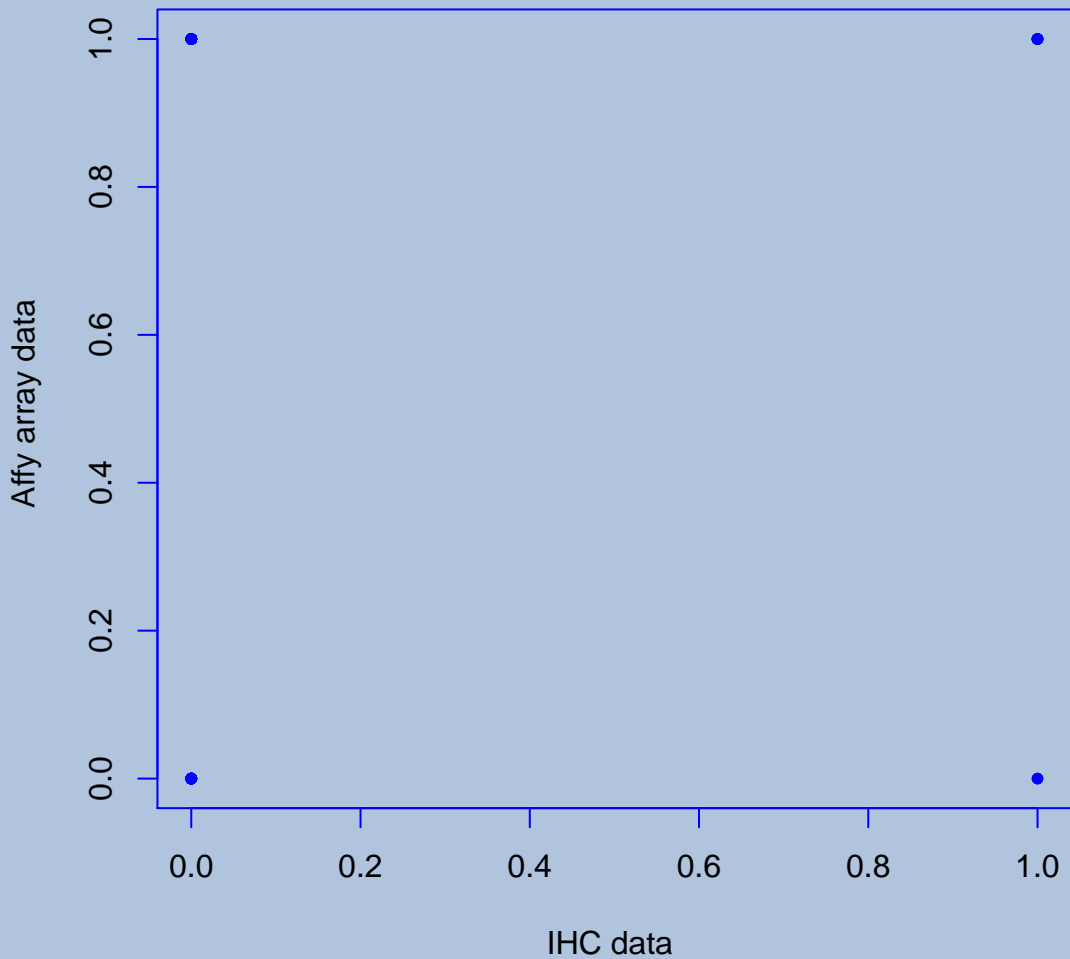

# Stromal\_CD49a

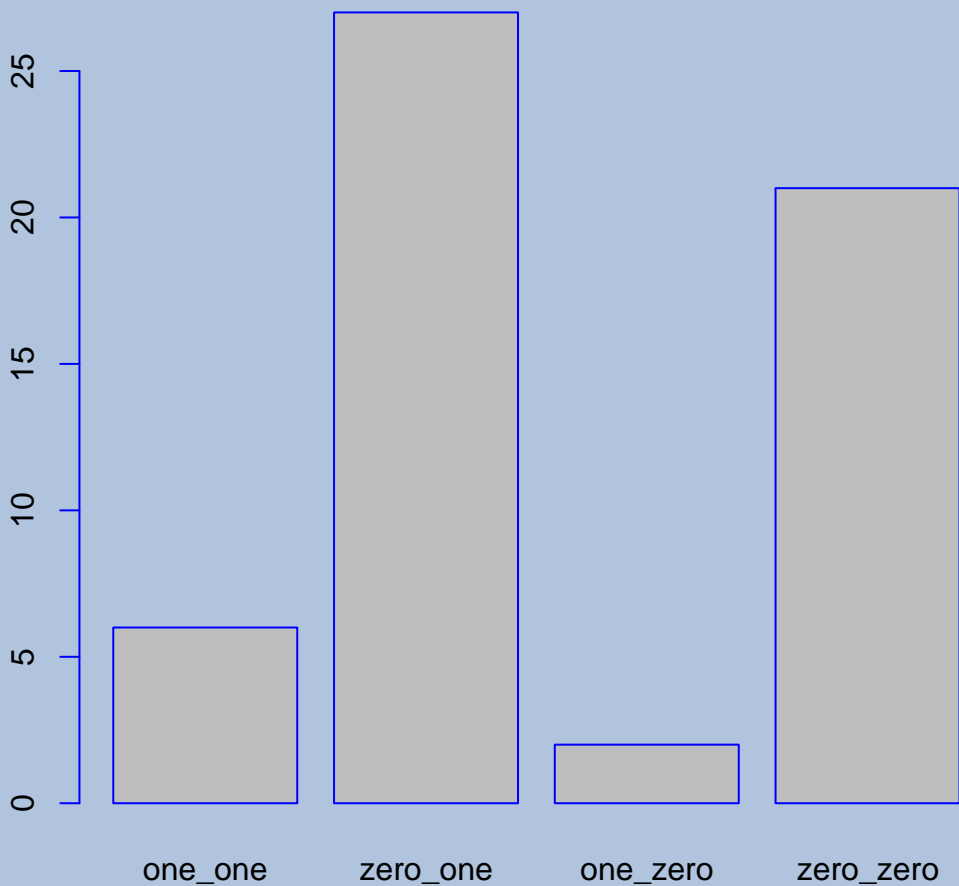



**Basal\_Epithelial\_CD104 , median**  
**spearman = 0.35 , pearson = 0.31**

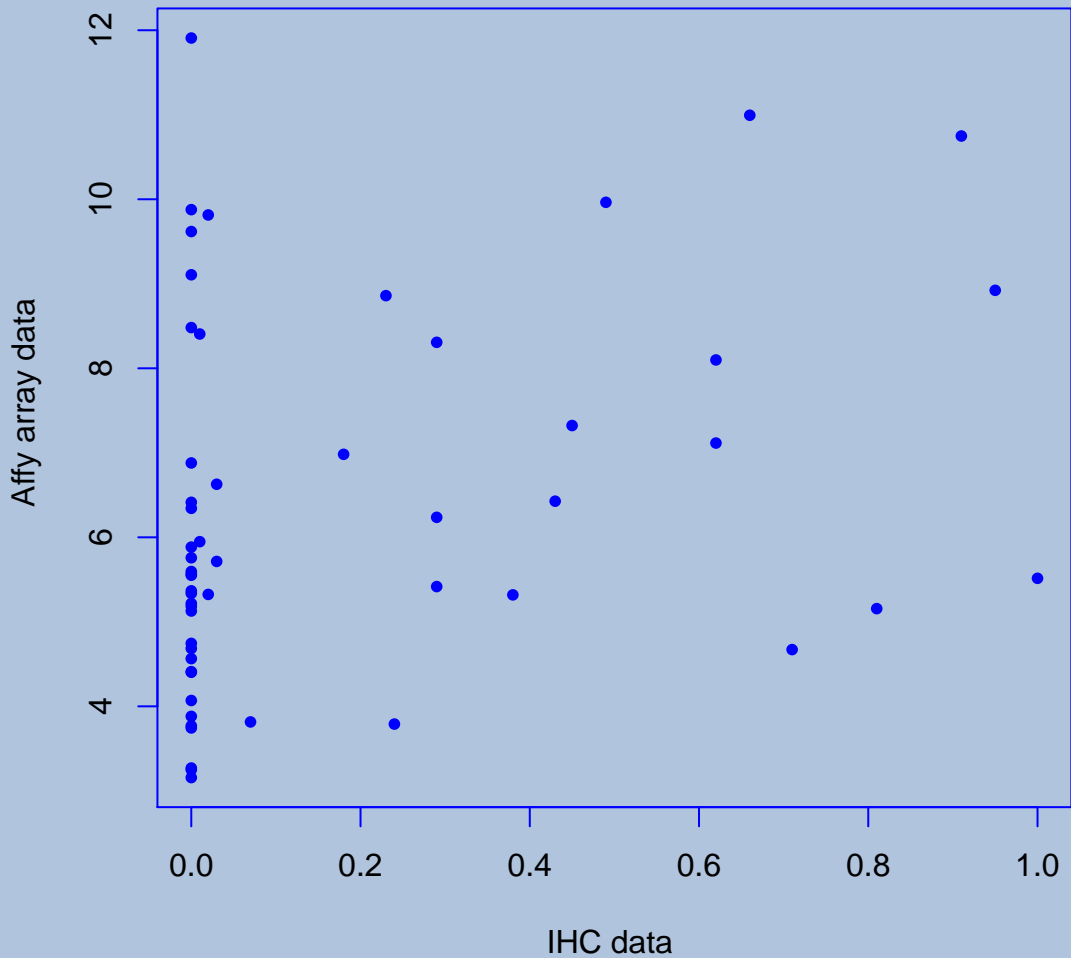

**Basal\_Epithelial\_CD104 , mean  
spearman = 0.42 , pearson = 0.34**

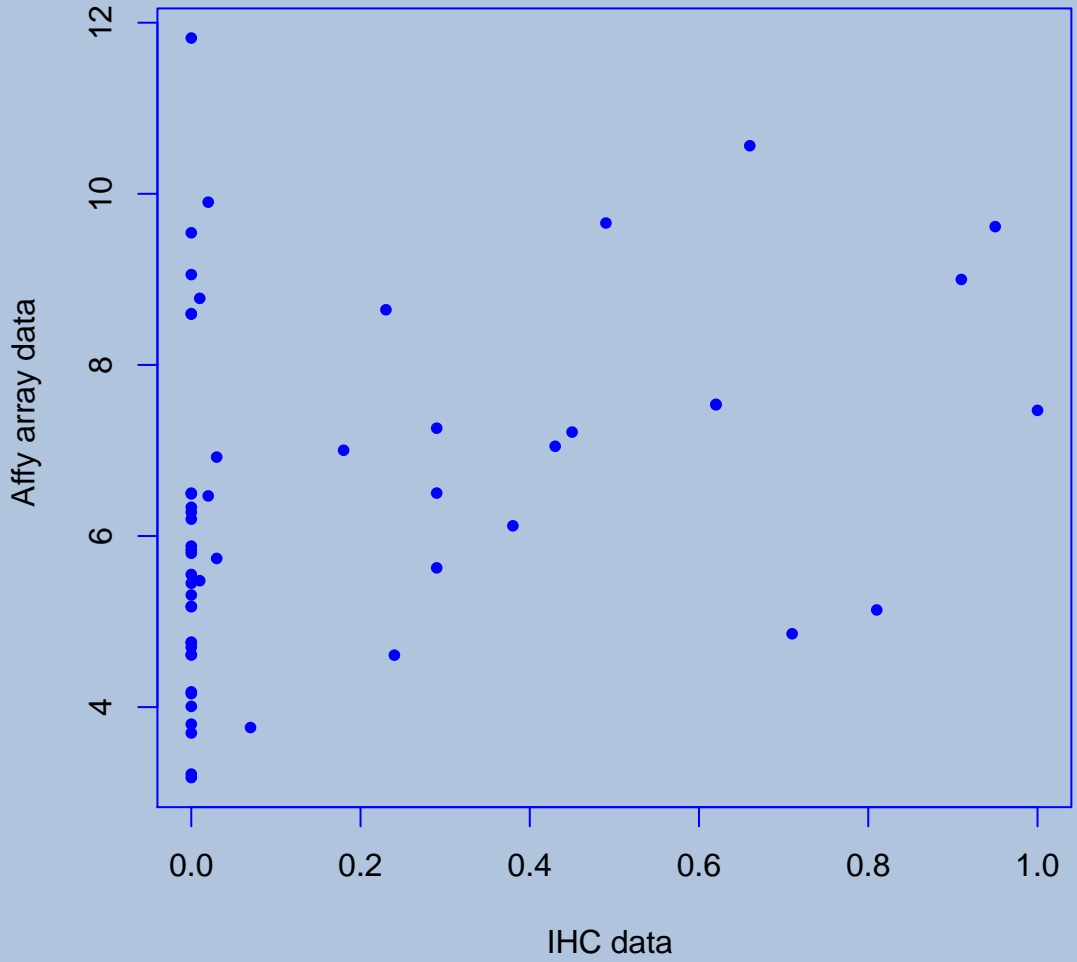

**Basal\_Epithelial\_CD104 , no\_zeros**  
**spearman = 0.25 , pearson = 0.26**

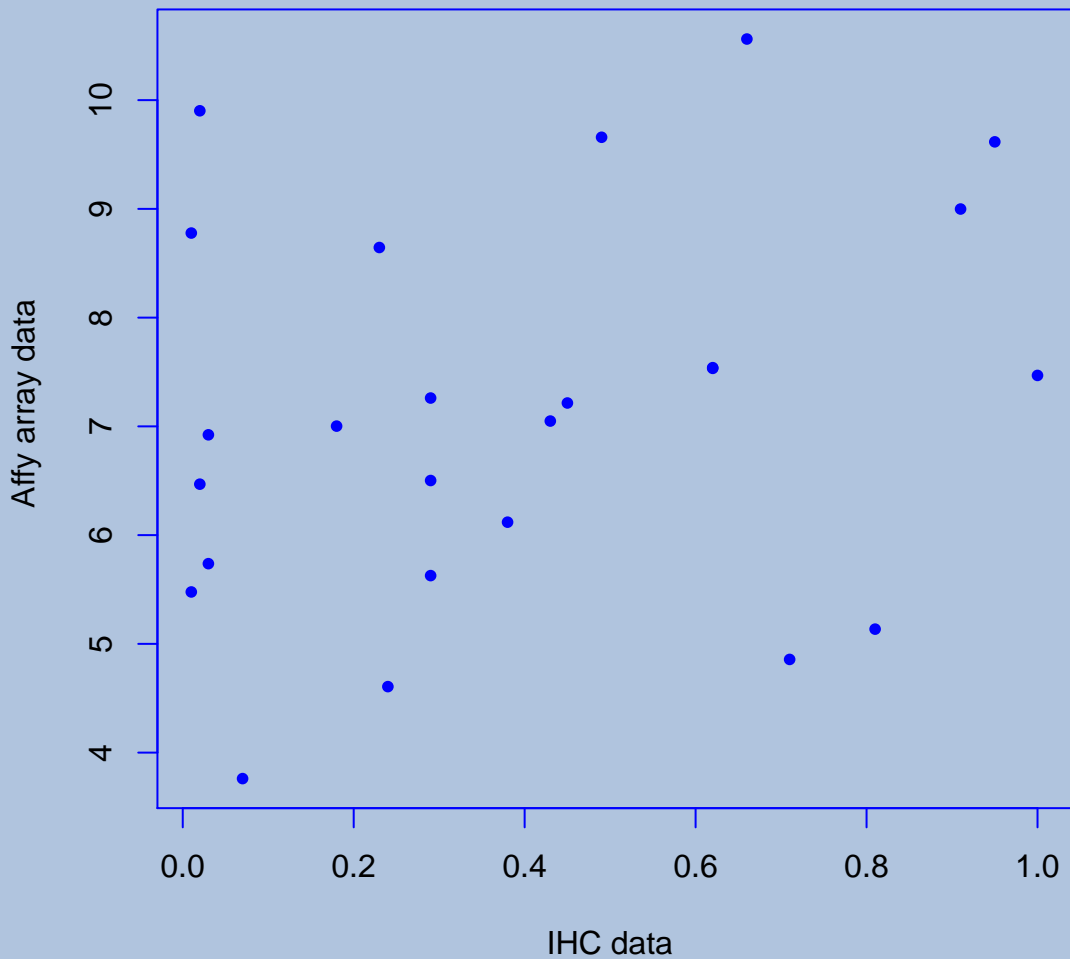

**Basal\_Epithelial\_CD104 , xform**  
**spearman = 0.25 , pearson = 0.27**

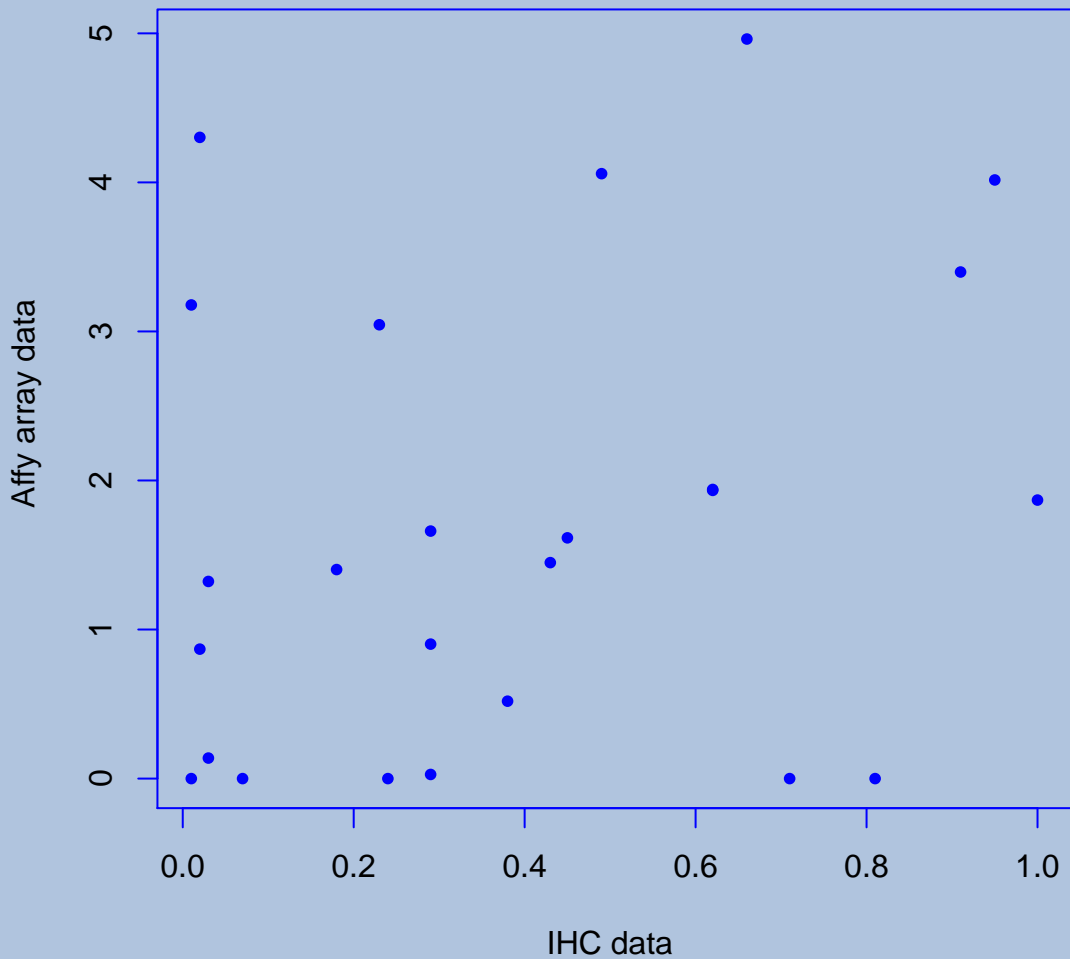

**Basal\_Epithelial\_CD104 , min**  
**spearman = 0.14 , pearson = 0.09**

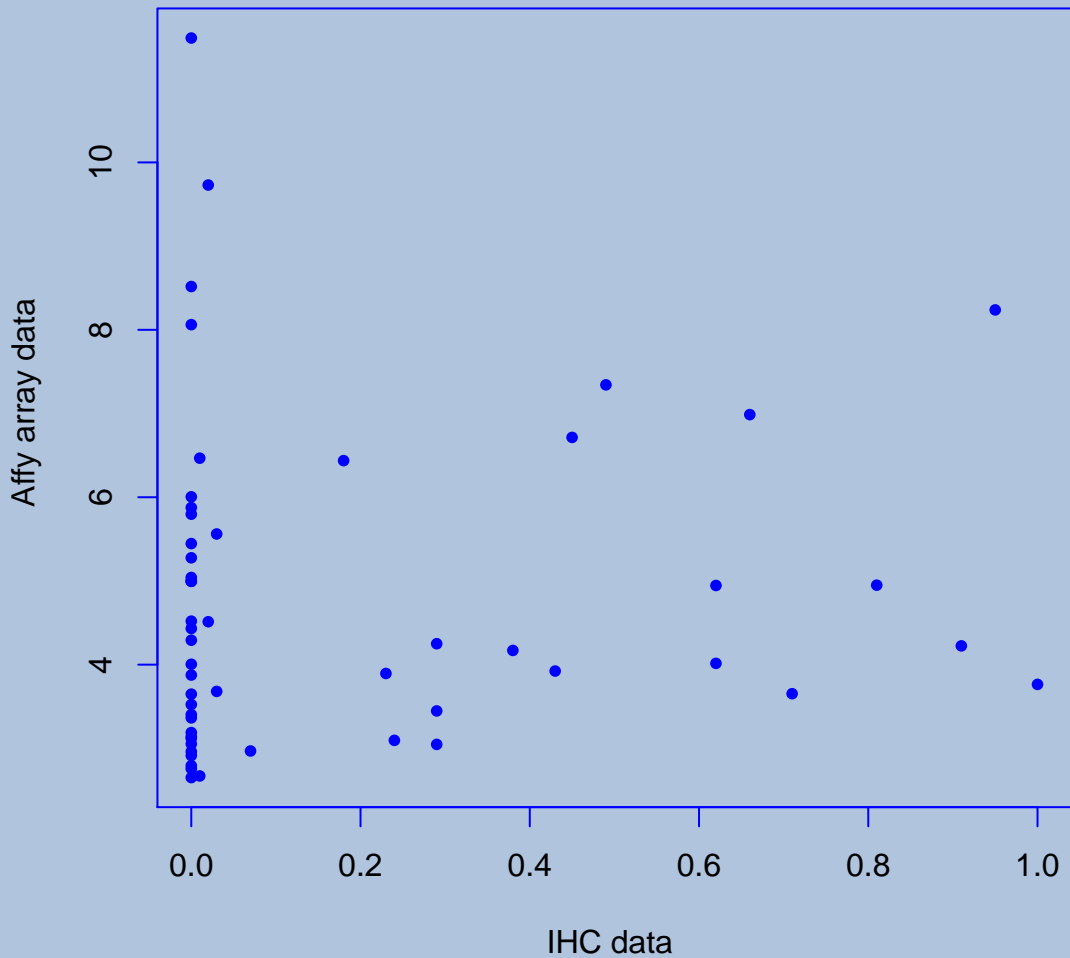

**Basal\_Epithelial\_CD104 , max  
spearman = 0.46 , pearson = 0.42**

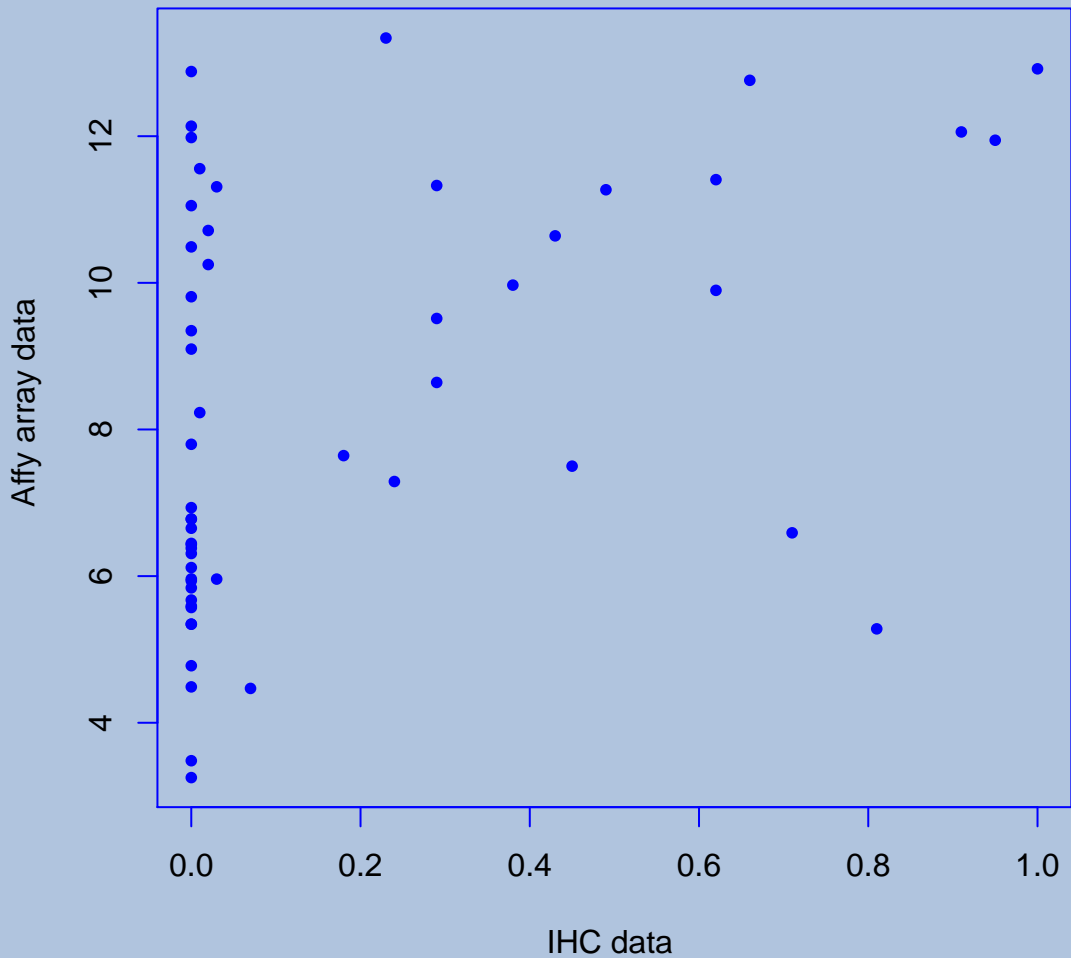

**Basal\_Epithelial\_CD104 , digitized**  
**spearman = 0.31 , pearson = 0.31**

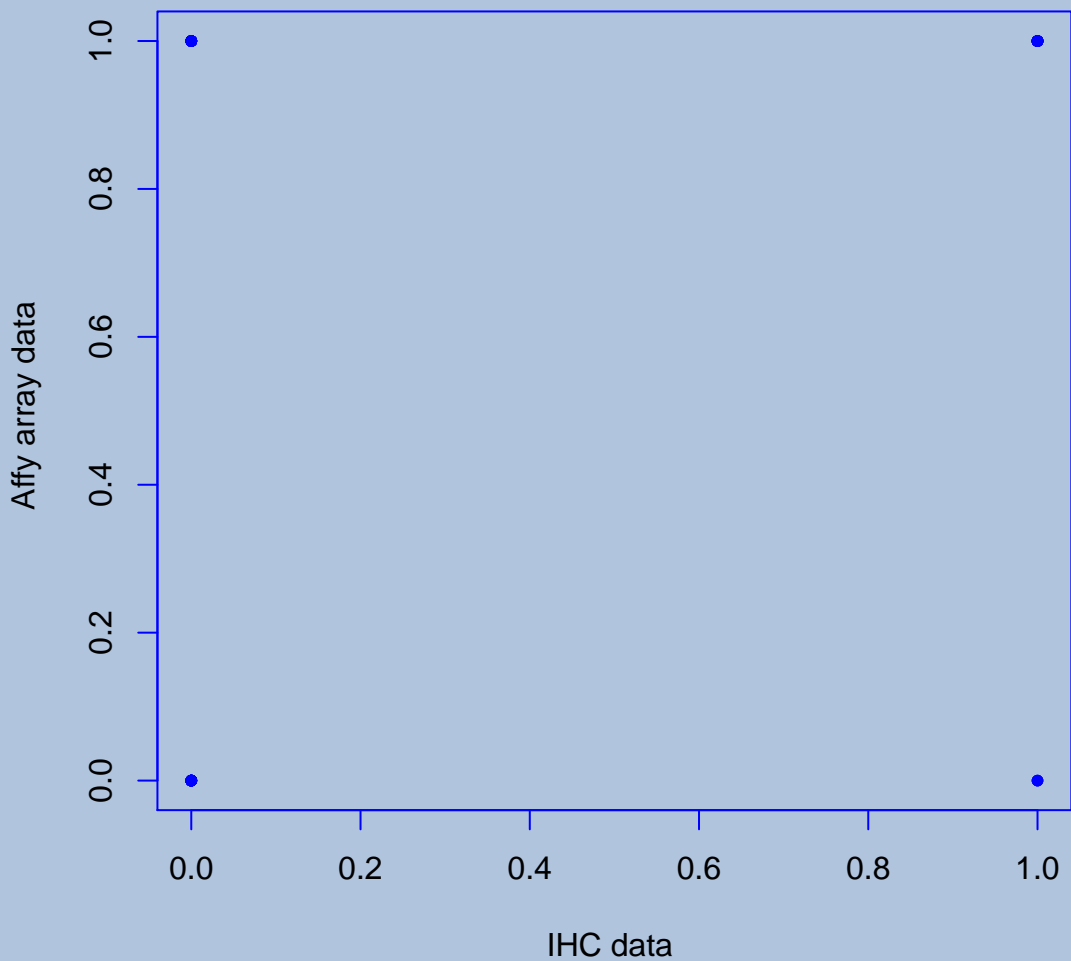

# Basal\_Epithelial\_CD104

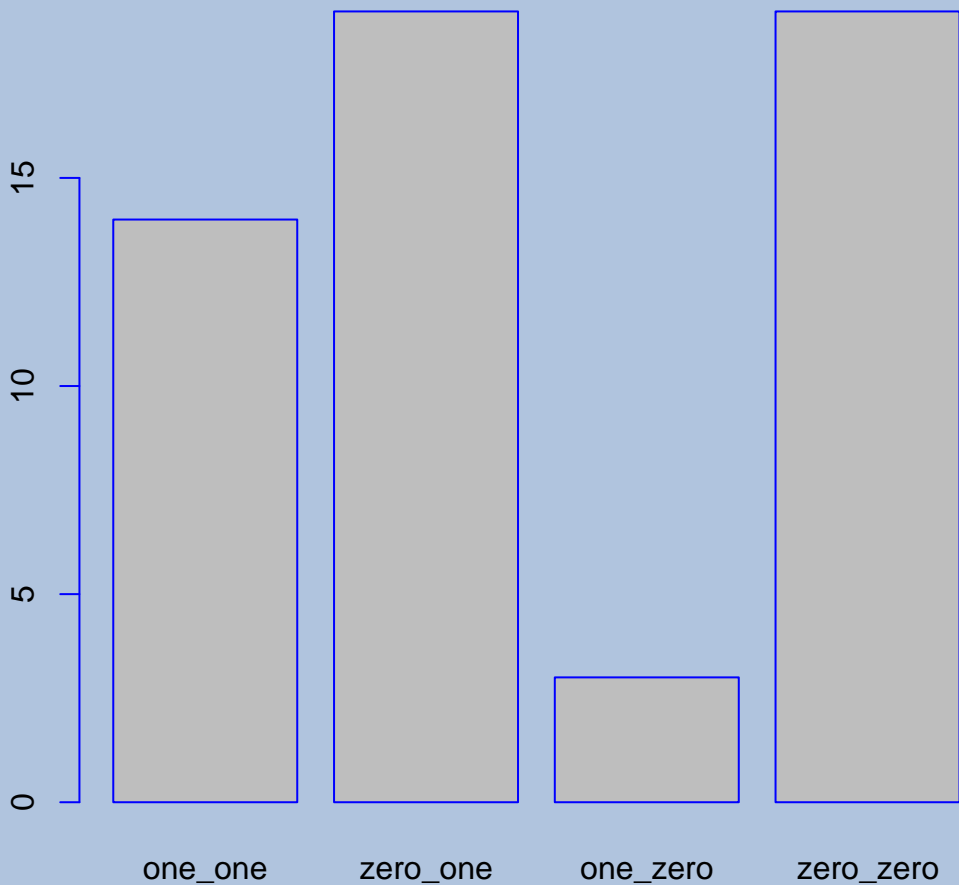



**Progenitor\_ABCG2 , median**  
**spearman = 0.22 , pearson = 0.17**

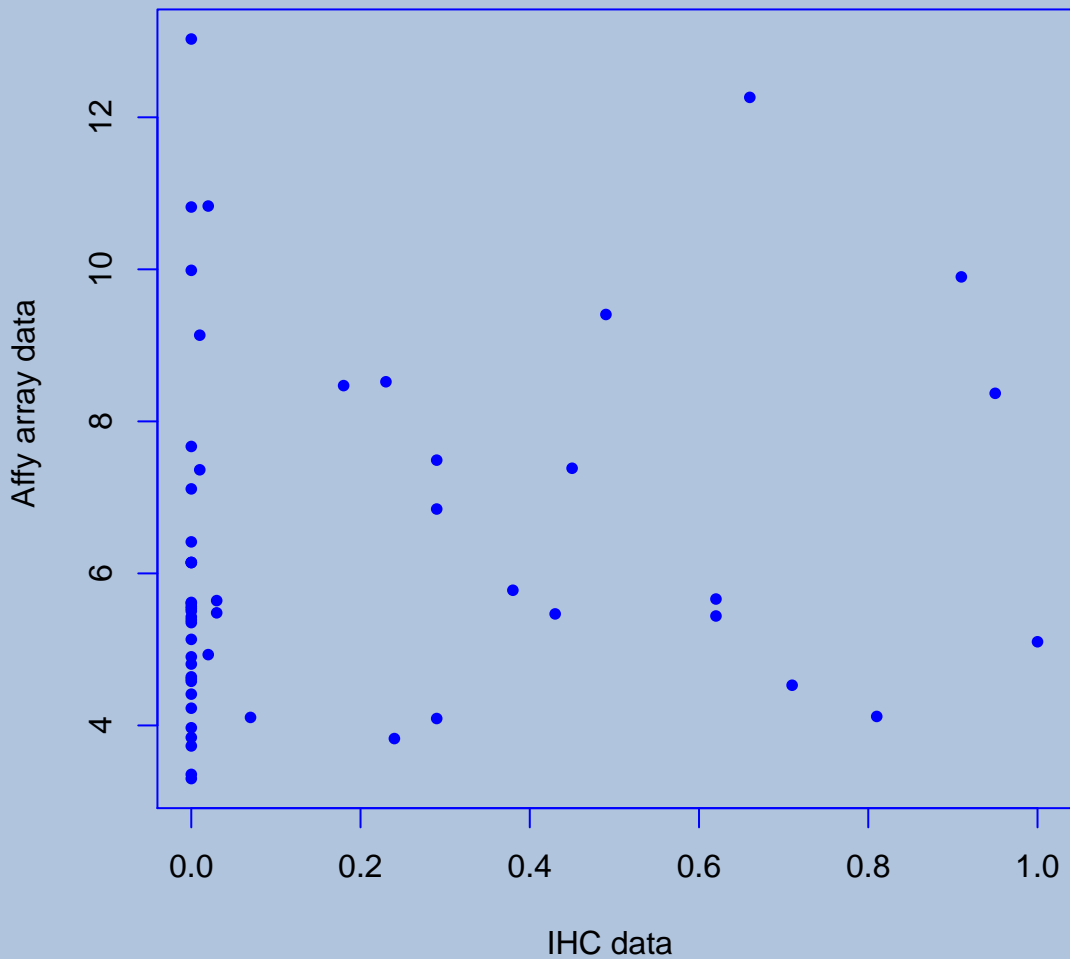

Progenitor\_ABCG2 , mean  
spearman = 0.34 , pearson = 0.23

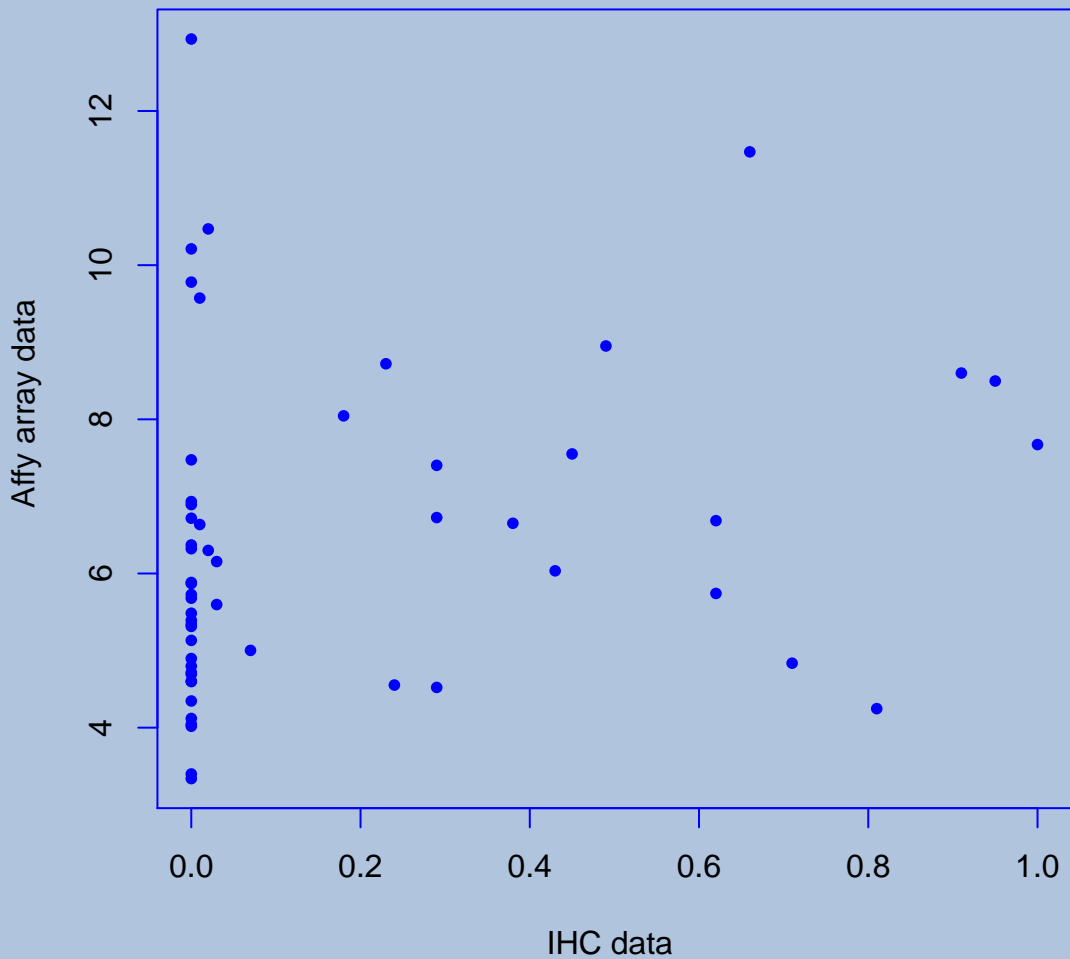

**Progenitor\_ABCG2 , no\_zeros**  
**spearman = 0.03 , pearson = 0.07**

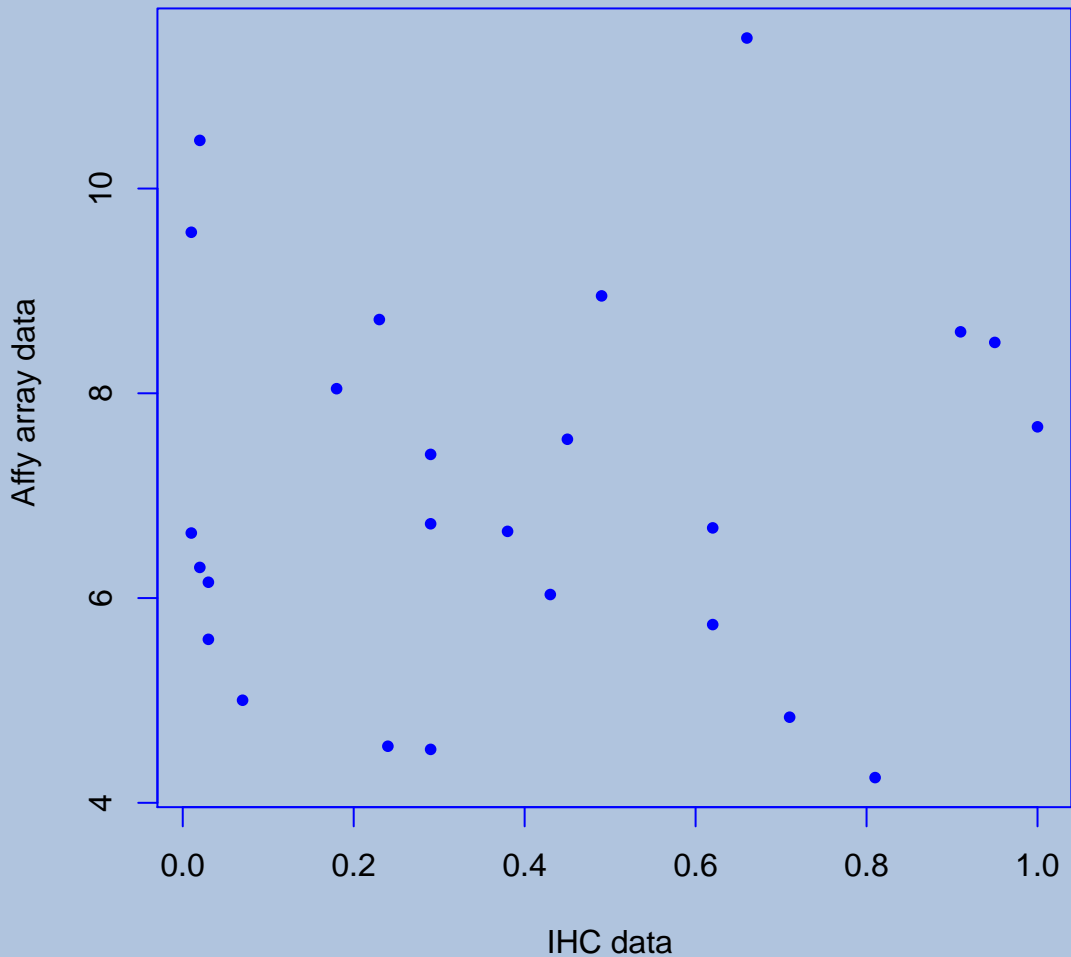

**Progenitor\_ABCG2 , xform**  
**spearman = 0.06 , pearson = 0.10**

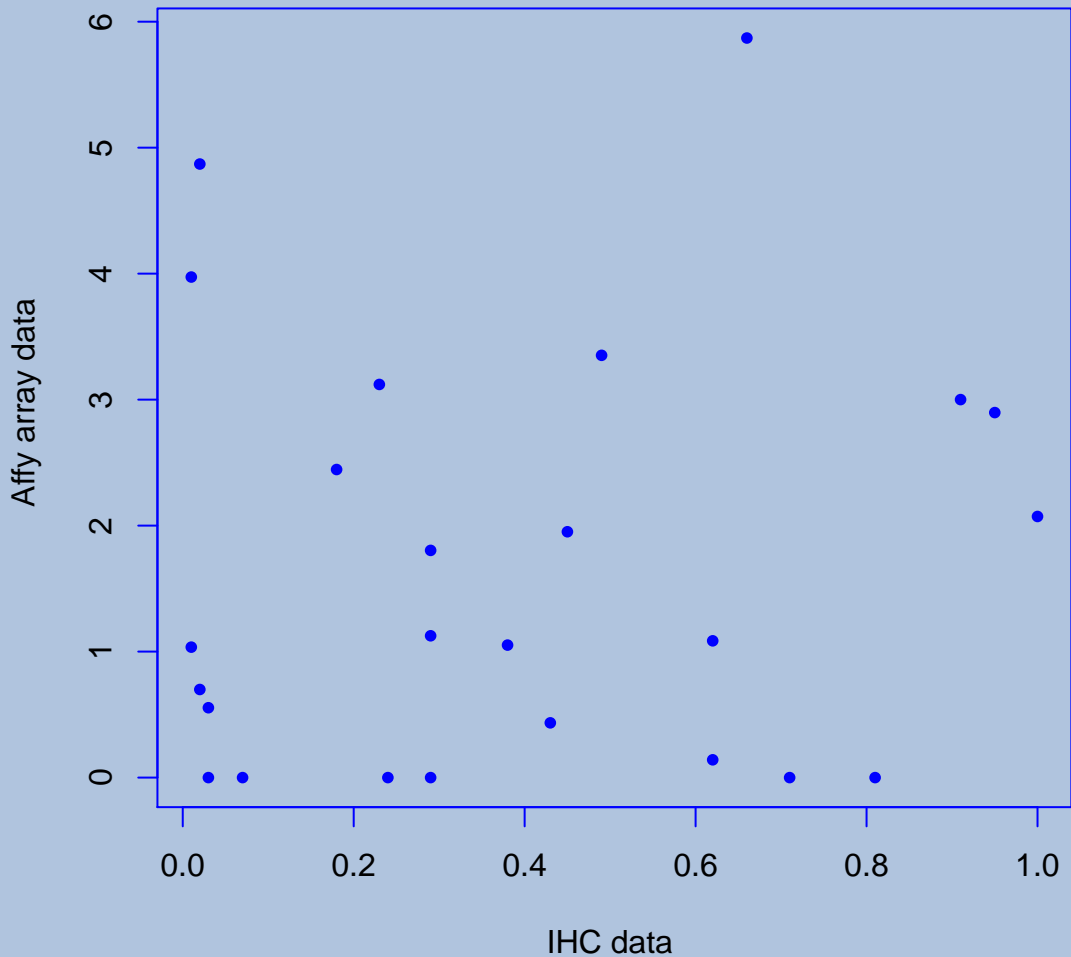

Progenitor\_ABCG2 , min  
spearman = 0.15 , pearson = 0.03

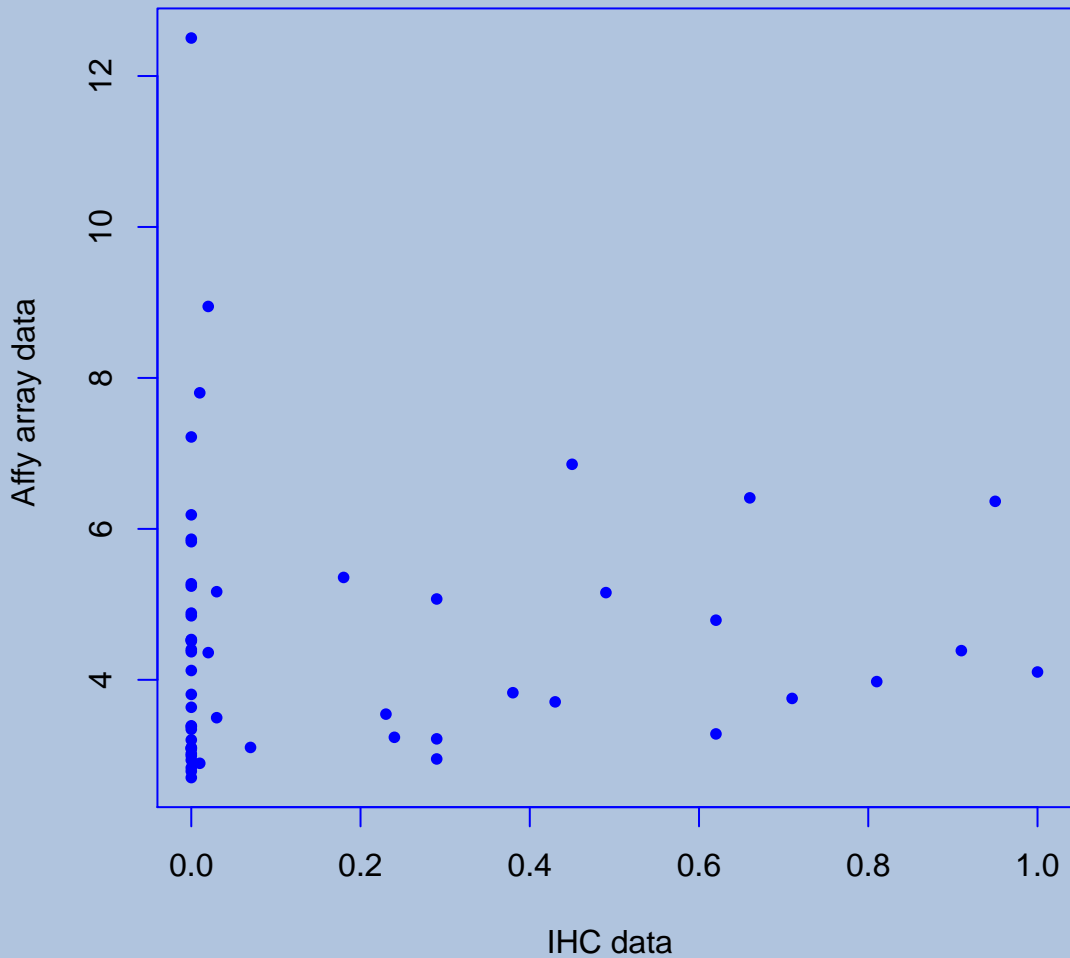

Progenitor\_ABCG2 , max  
spearman = 0.44 , pearson = 0.35

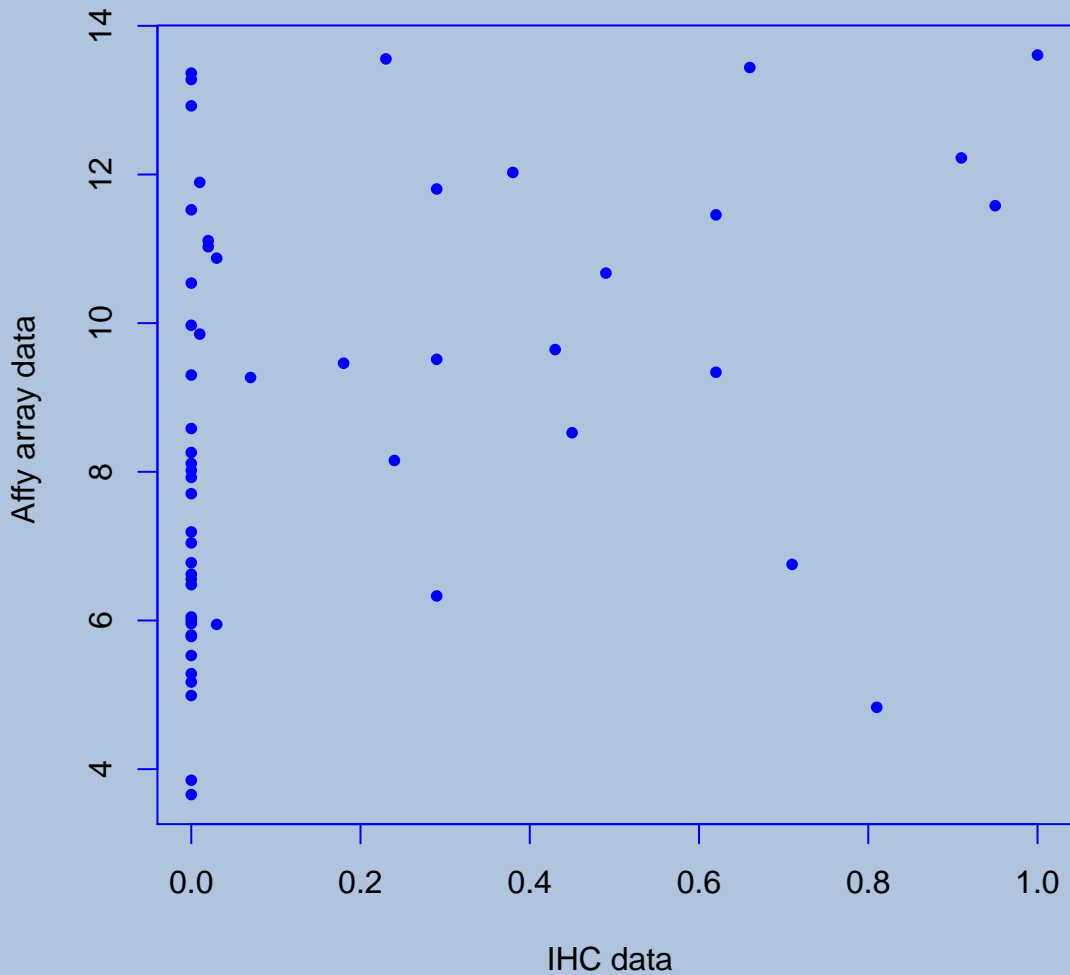

**Progenitor\_ABCG2 , digitized**  
**spearman = 0.25 , pearson = 0.25**

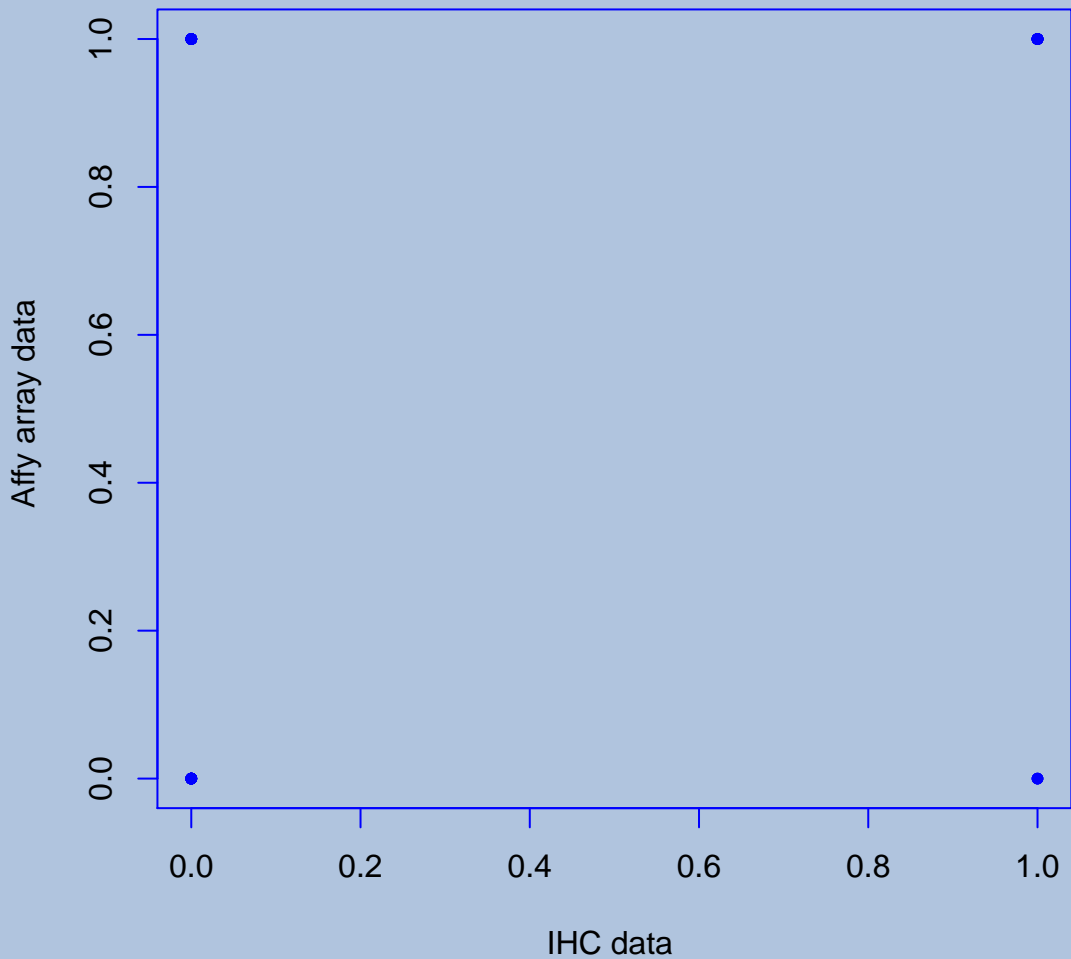

# Progenitor\_ABCG2

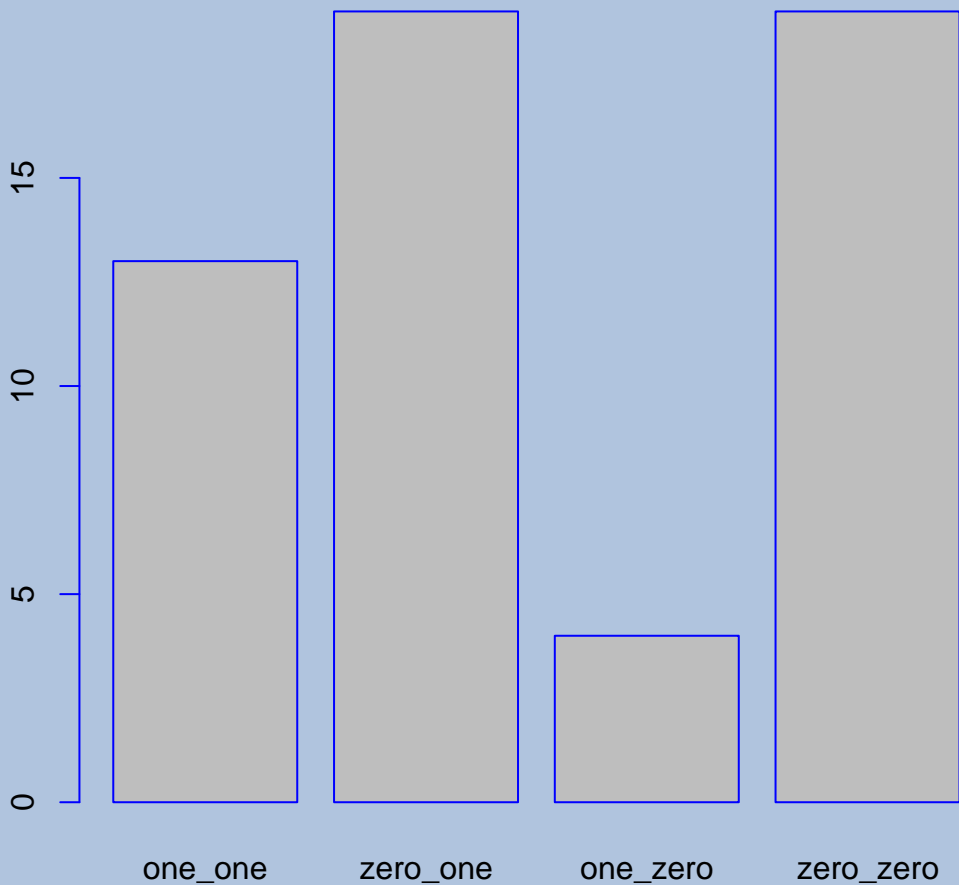



**Cancer\_CD26 , median**  
**spearman = 0.45 , pearson = 0.49**

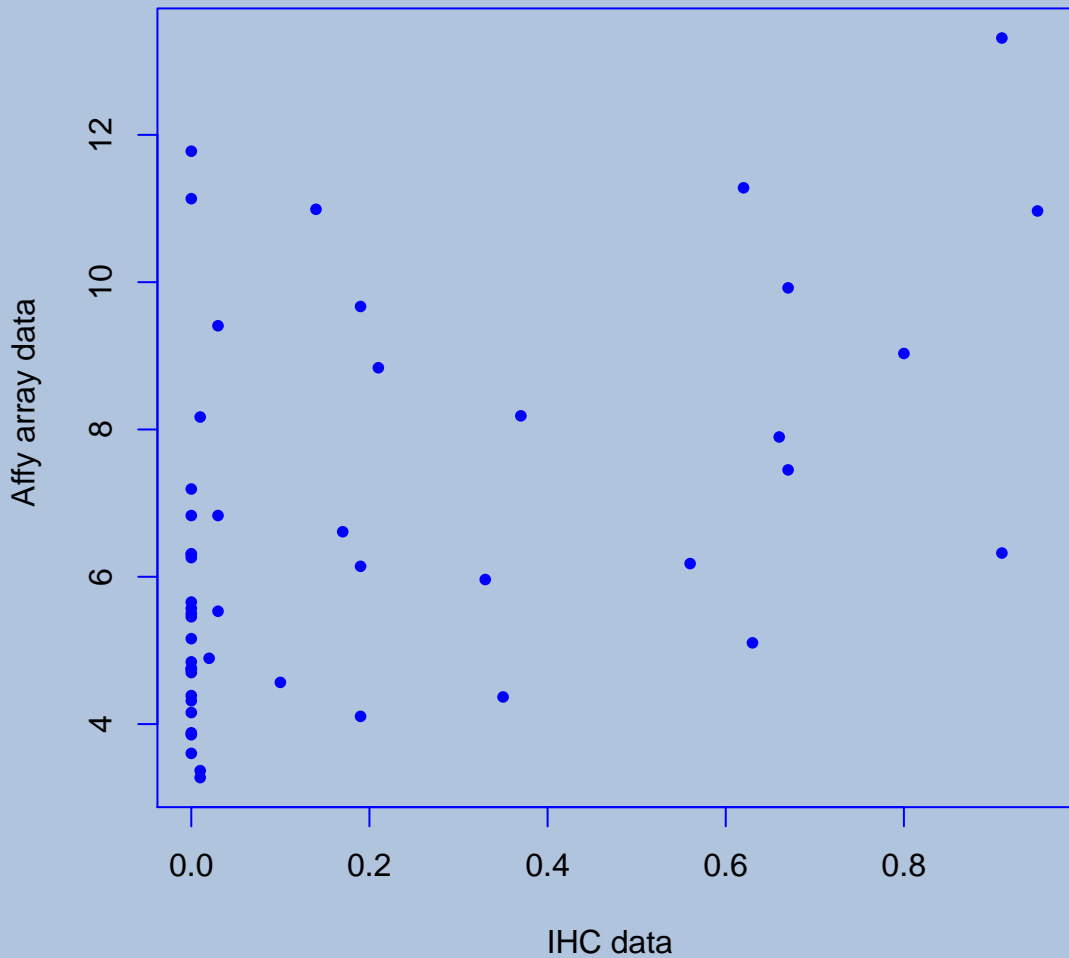

**Cancer\_CD26 , mean**  
**spearman = 0.49 , pearson = 0.50**

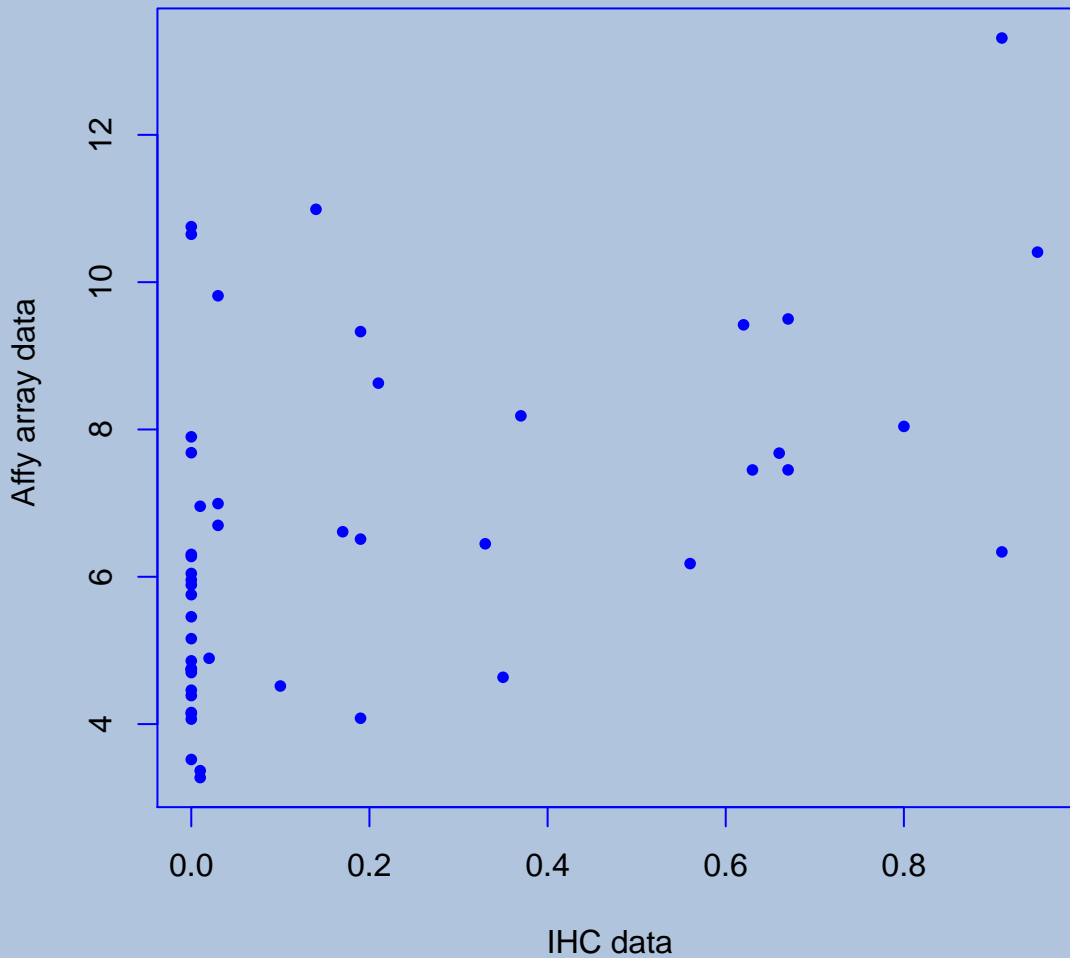

**Cancer\_CD26 , no\_zeros**  
**spearman = 0.46 , pearson = 0.48**

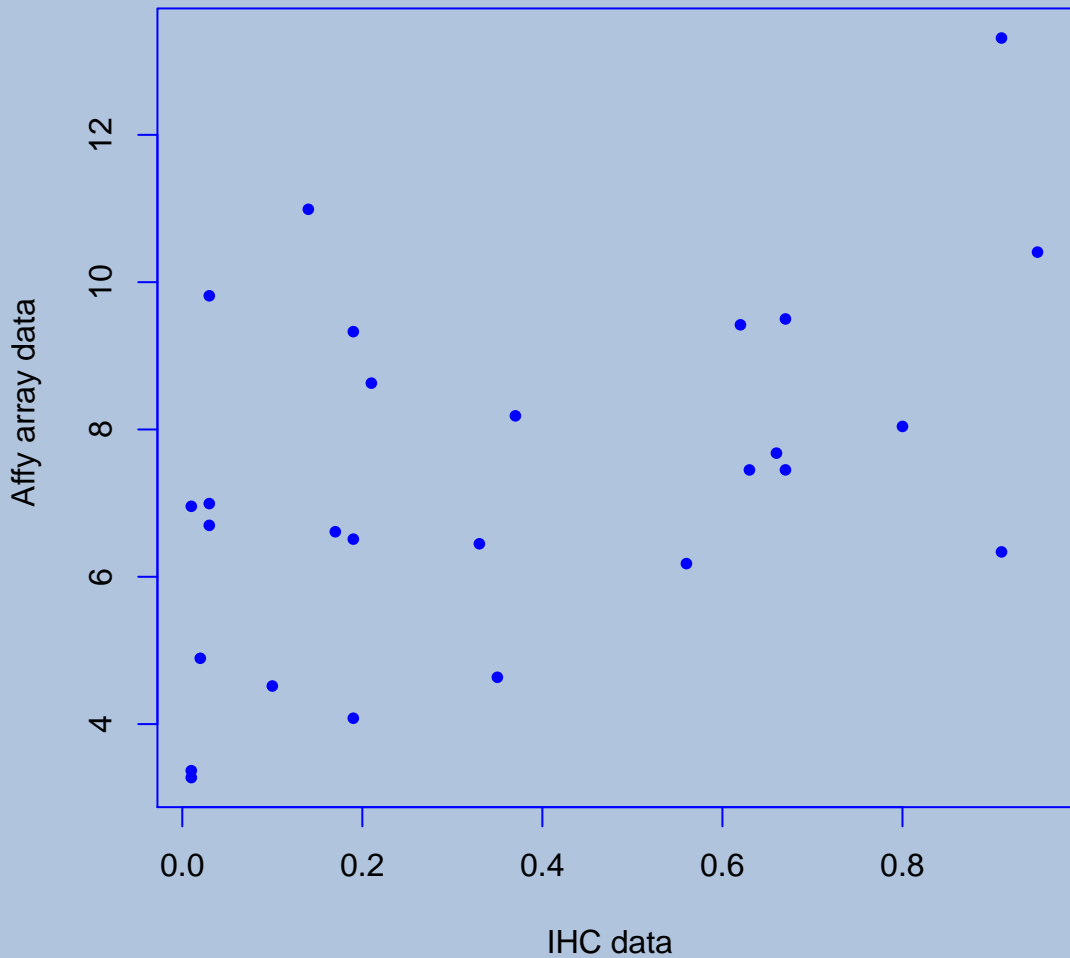

**Cancer\_CD26 , xform**  
**spearman = 0.44 , pearson = 0.44**

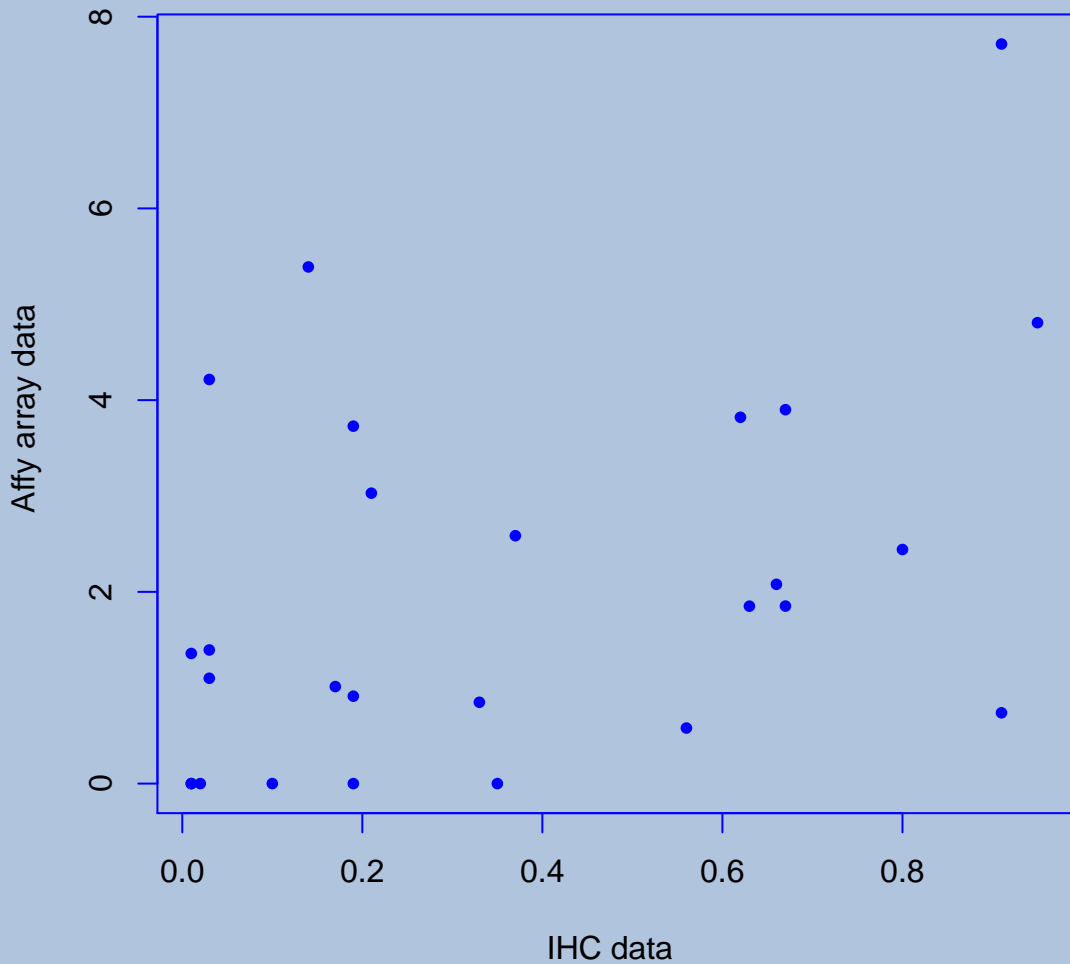

**Cancer\_CD26 , min**  
**spearman = -0.01 , pearson = 0.21**

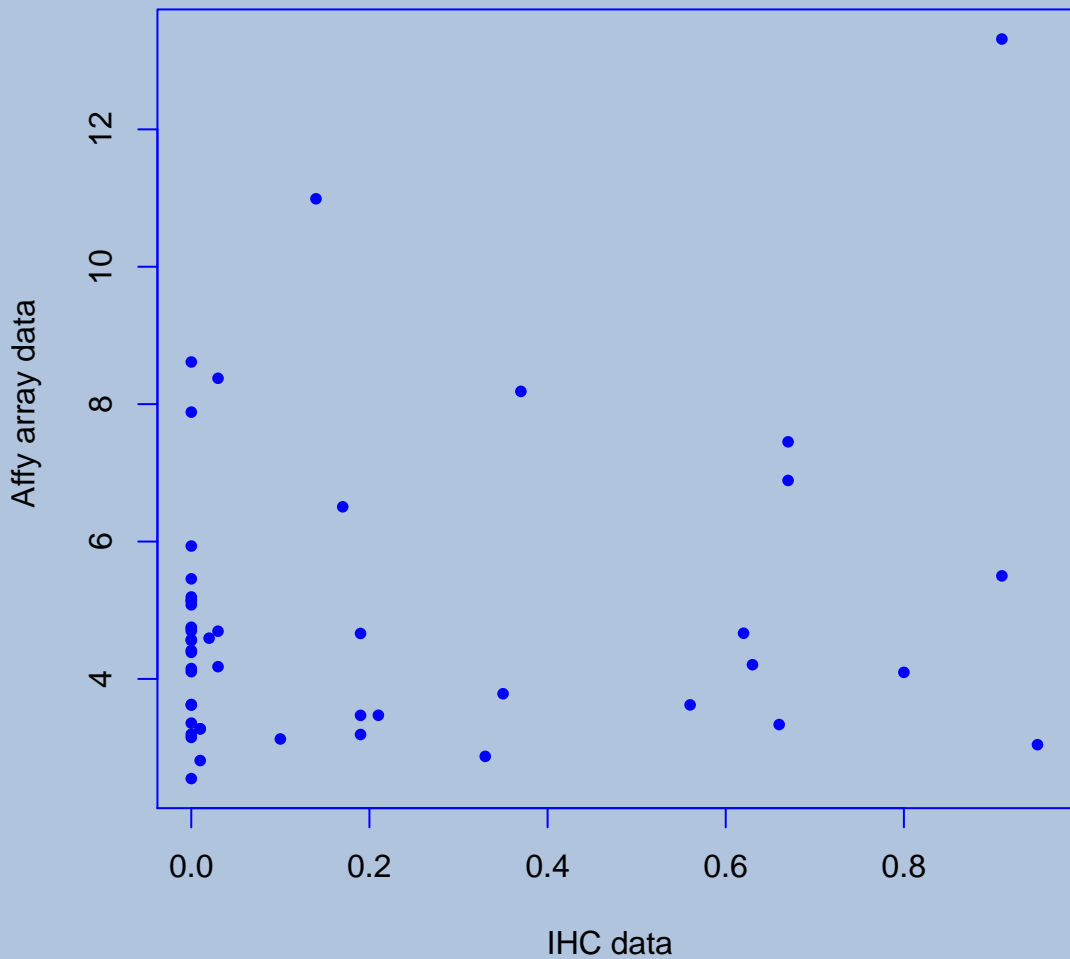

**Cancer\_CD26 , max**  
**spearman = 0.51 , pearson = 0.48**

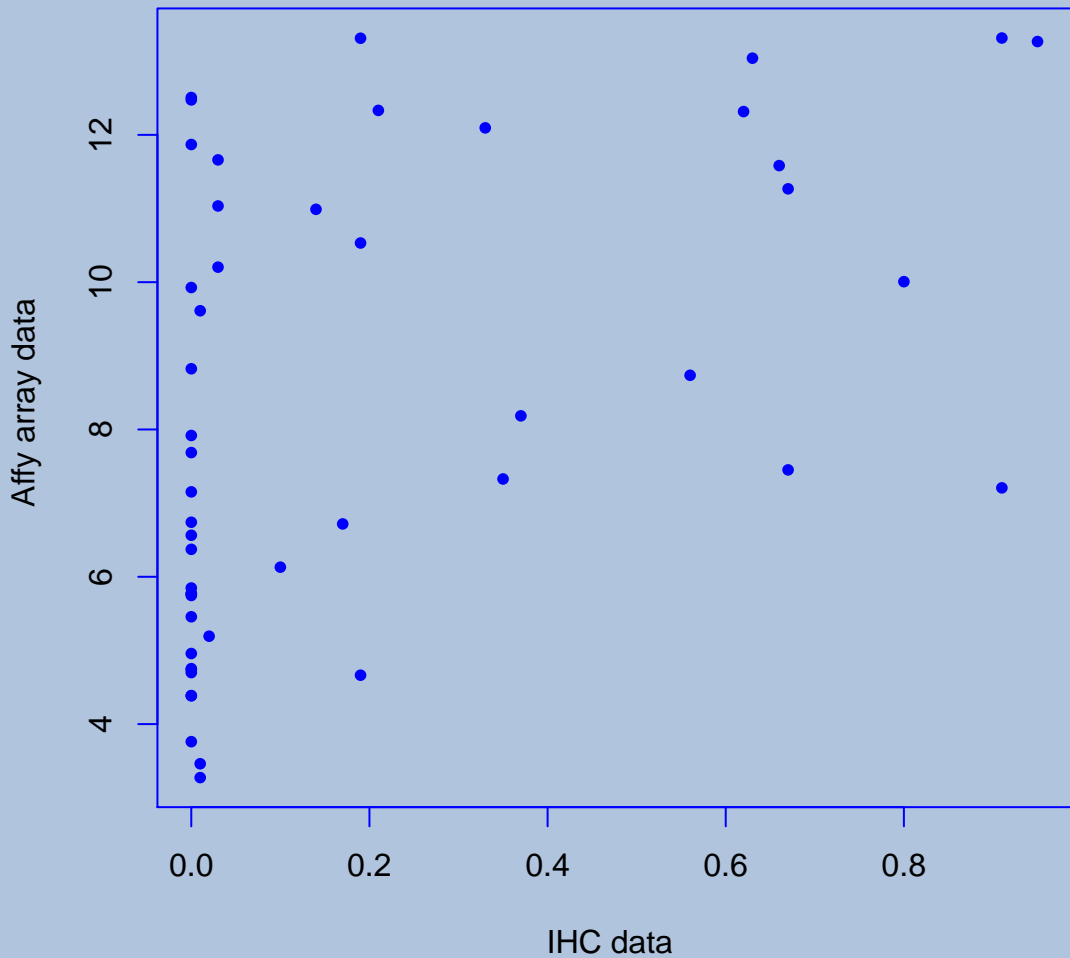

**Cancer\_CD26 , digitized**  
**spearman = 0.40 , pearson = 0.40**

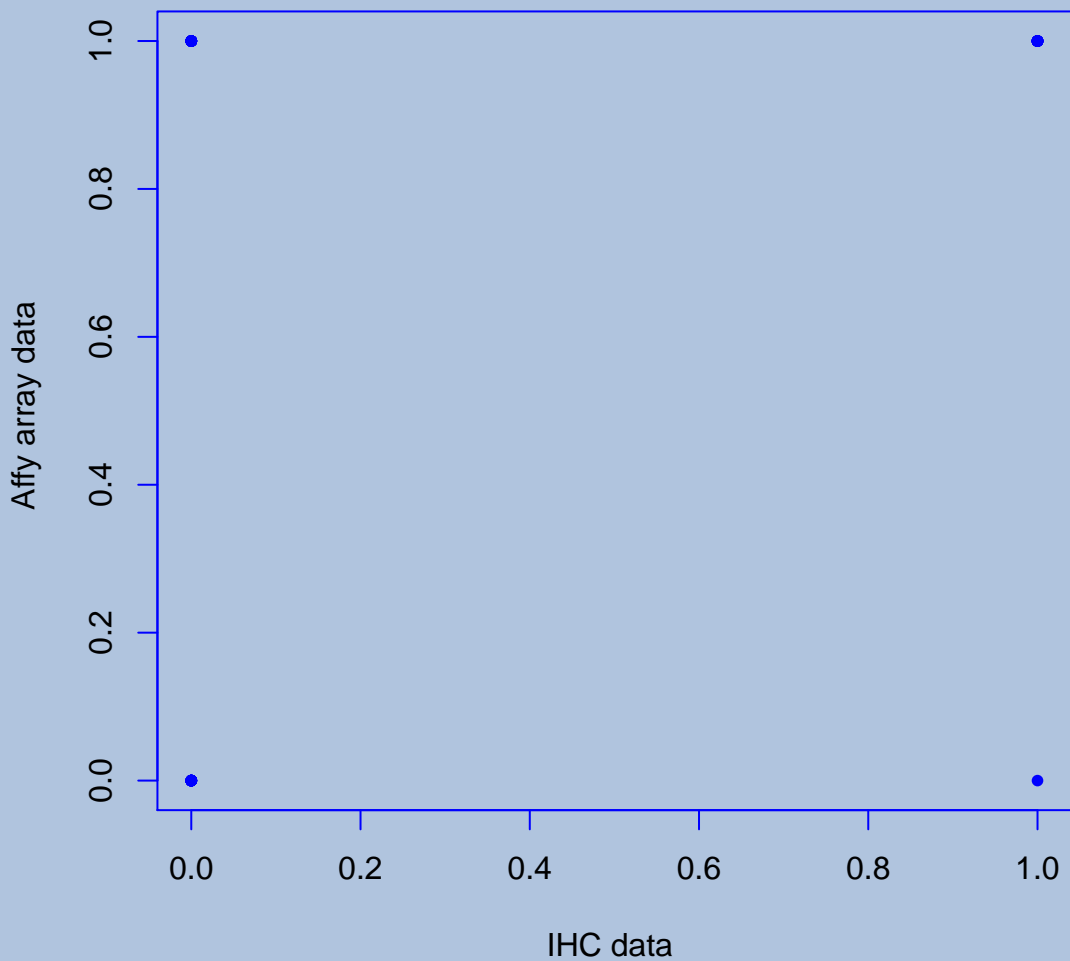

# Cancer\_CD26

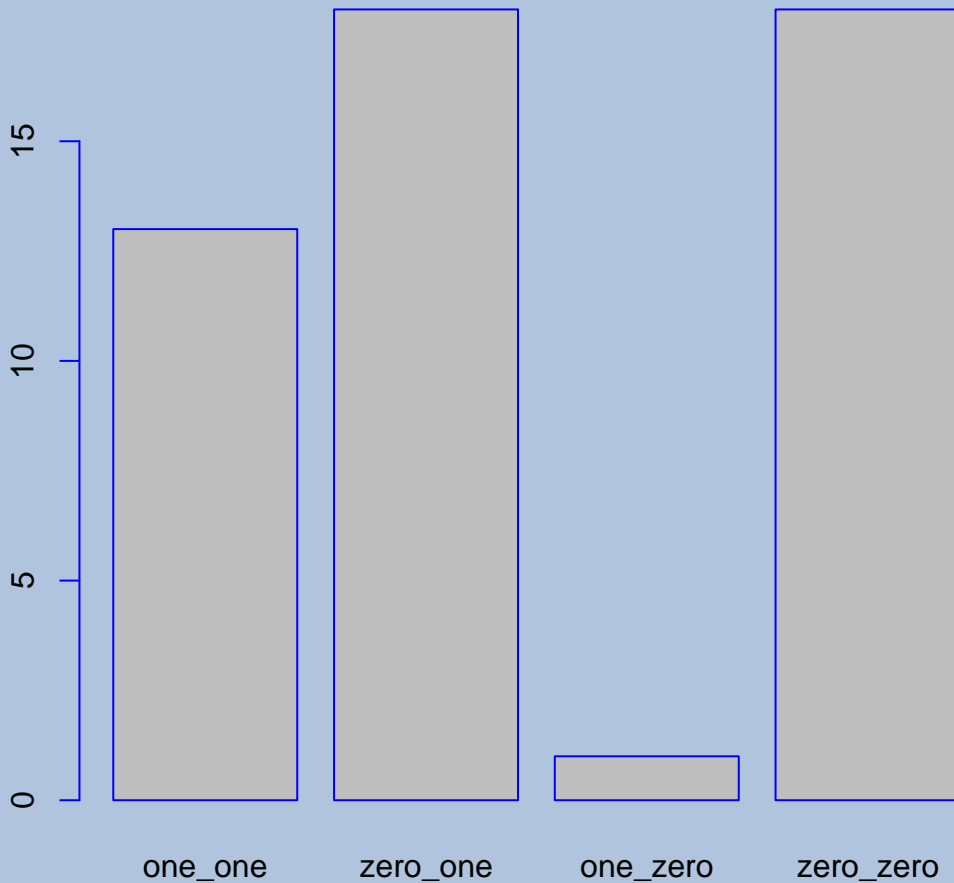

Supplement: 1471-2164-9-246-S1.pdf [file 1471-2164-9-246-S1.pdf]
