# Supplementary material for: Correlation of mRNA and protein levels: Cell type-specific gene expression of cluster designation antigens in the prostate
Source: PubMed Central journal article supplement (PMC2413246; doi:10.1186/1471-2164-9-246), 2008-05-23

Luminal\_CD26.mRNA vs Luminal\_CD26.IHC, n=56

spearman = 0.54

pearson = 0.52

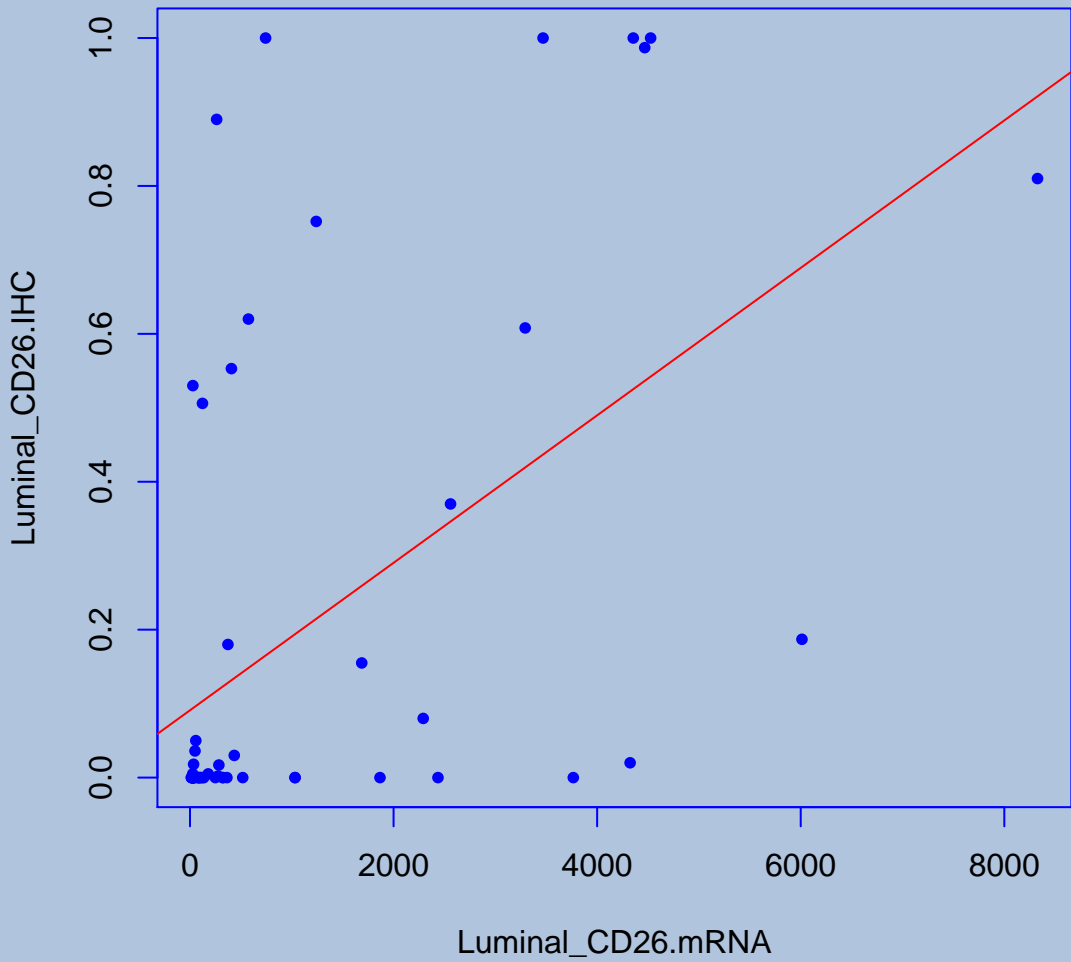

Luminal\_LCM.Agilent vs Luminal\_CD26.IHC, n=54

spearman = 0.43

pearson = 0.57

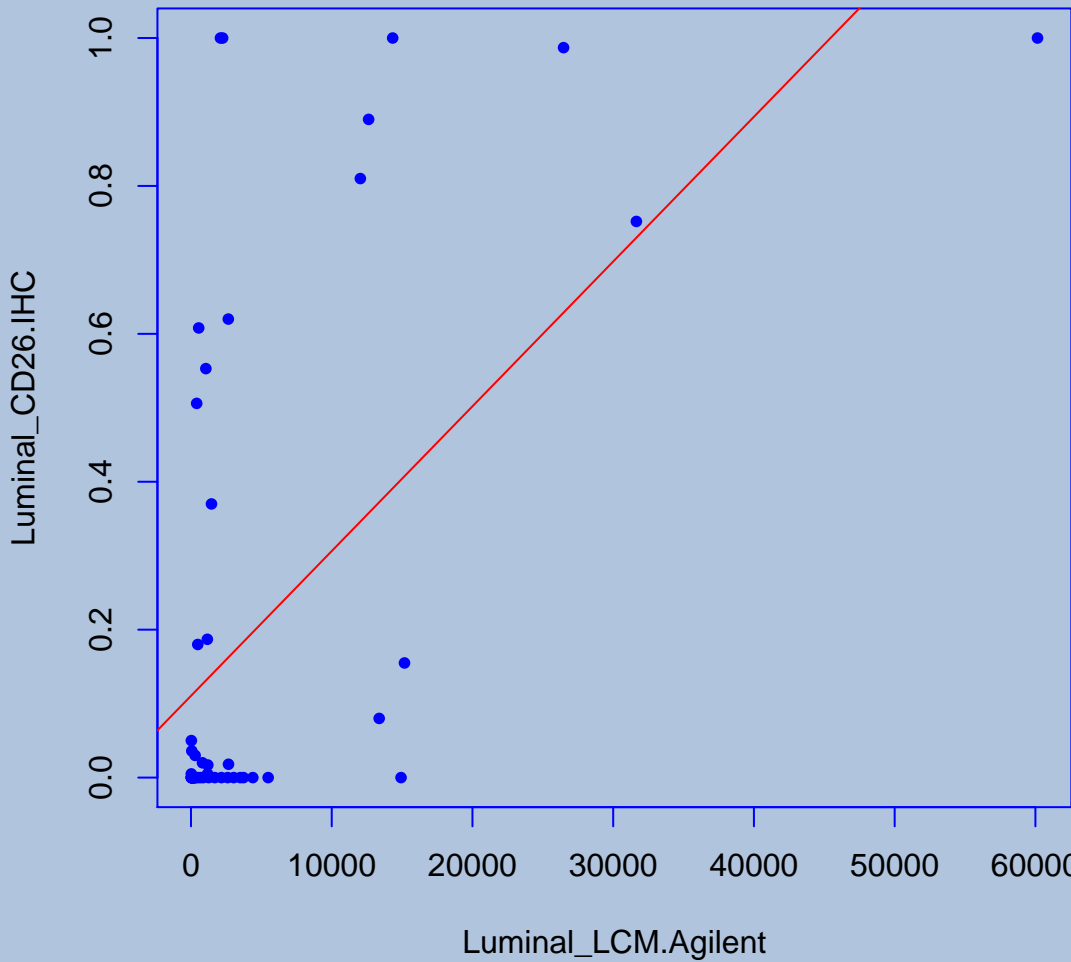

Luminal\_LCM.Agilent vs Luminal\_CD26.mRNA, n=55

spearman = 0.58

pearson = 0.43

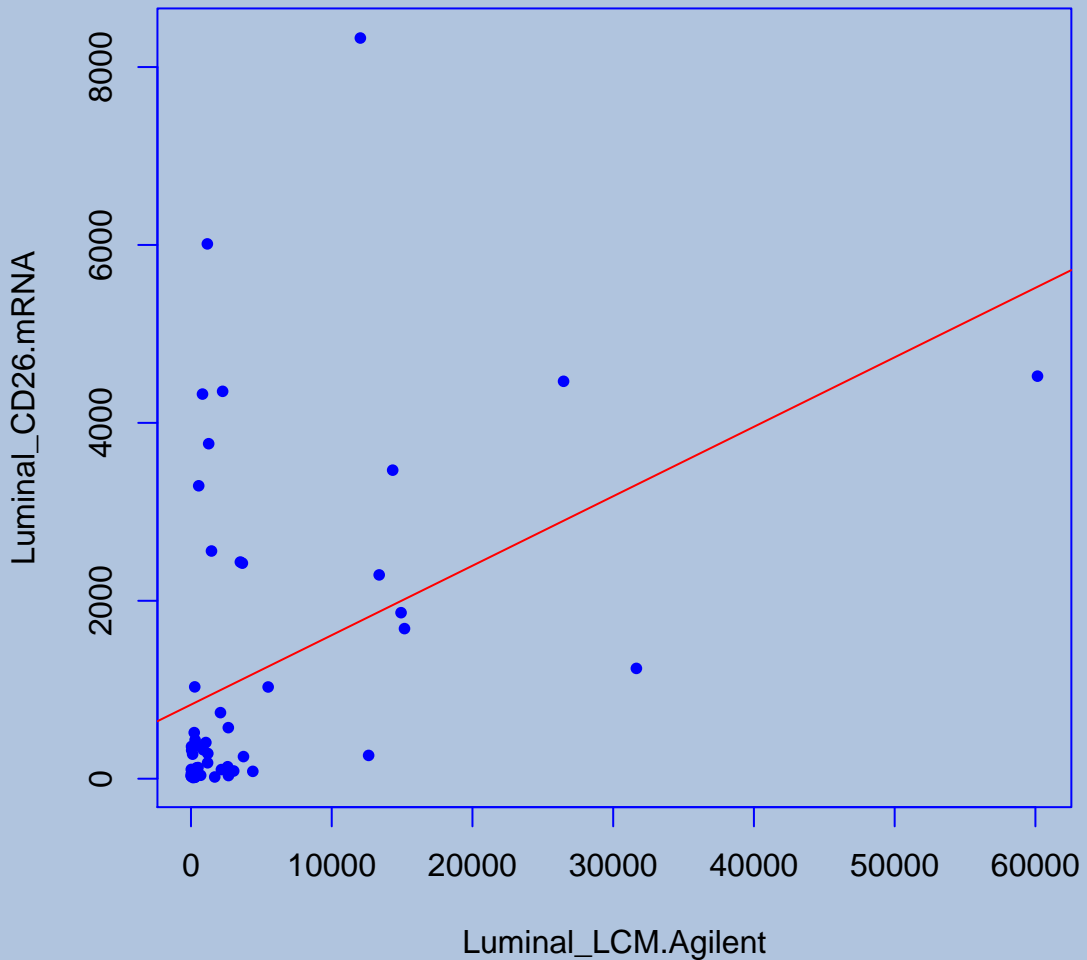

Stromal\_CD49.mRNA vs Stromal\_CD49.IHC, n=57

spearman = 0.21

pearson = 0.22

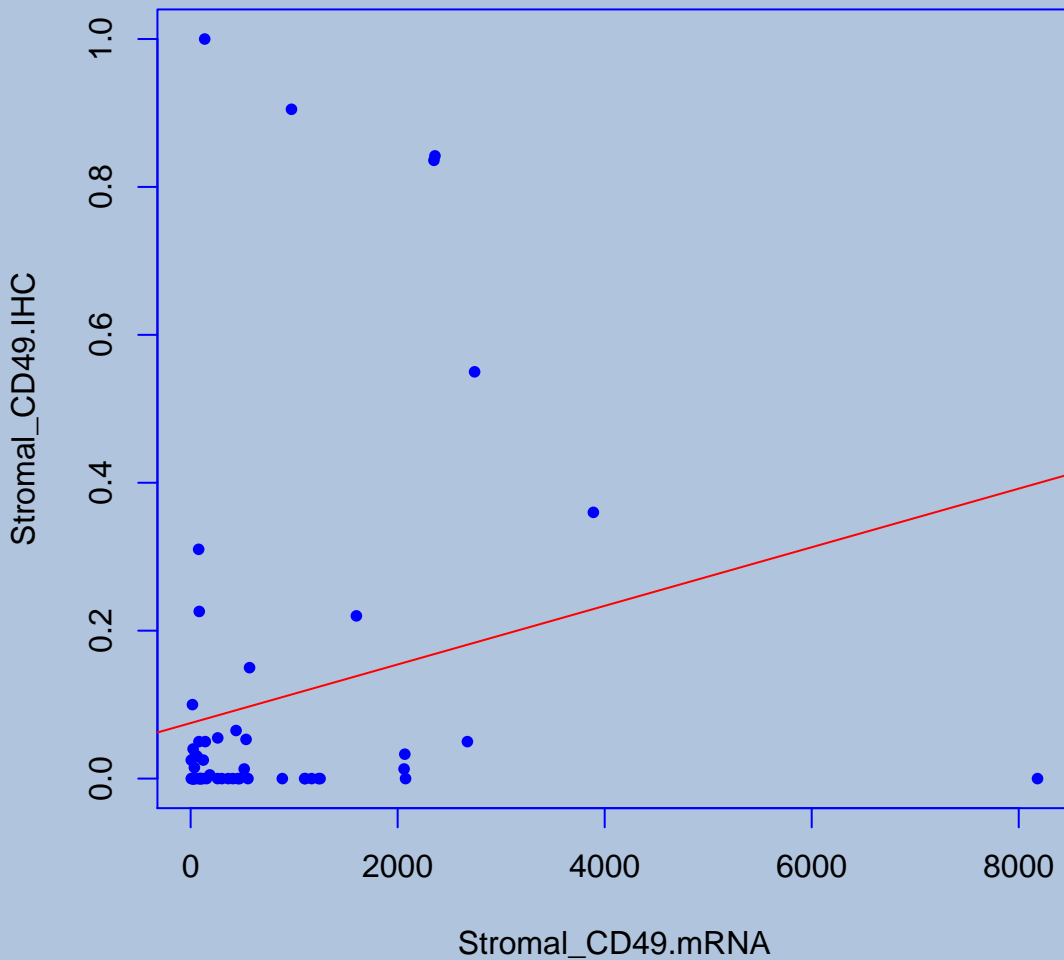

Stromal\_LCM.mRNA vs Stromal\_CD49.IHC, n=57

spearman = 0.26

pearson = 0.26

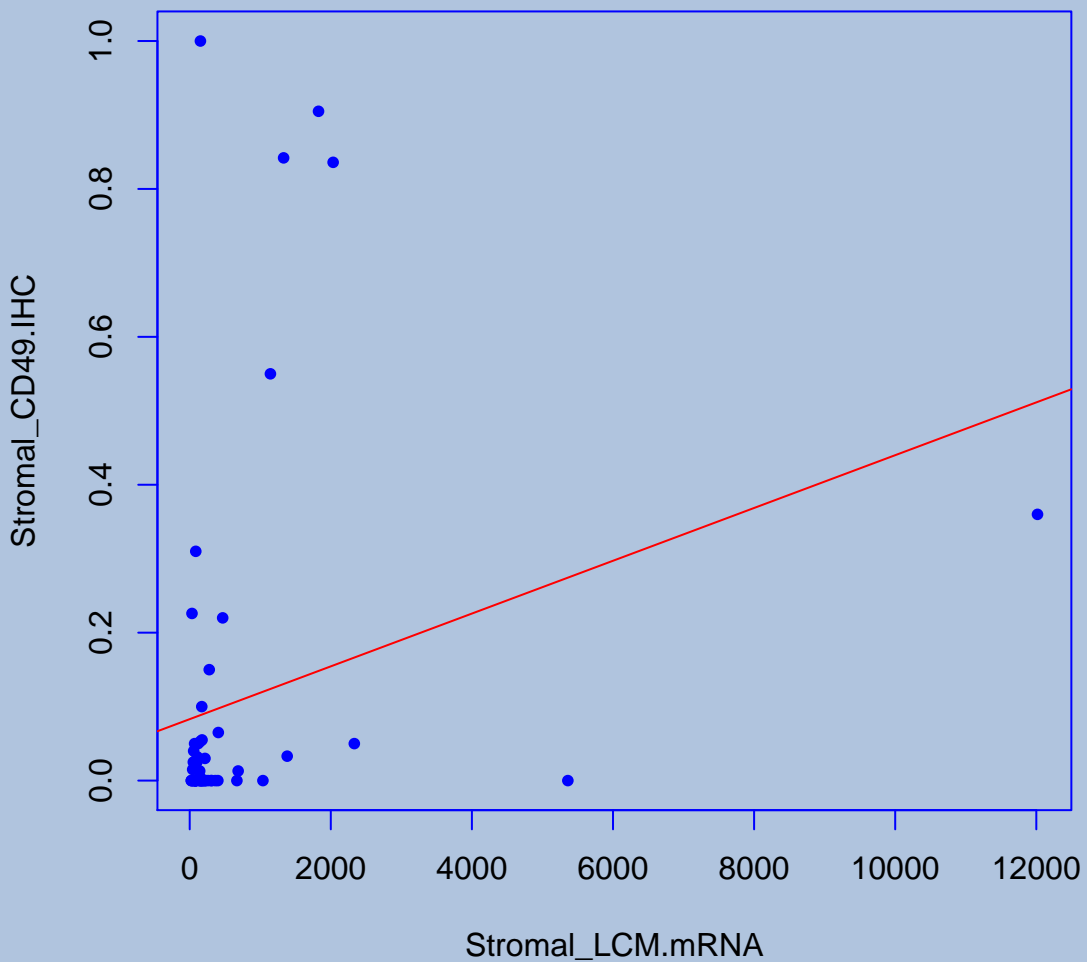

Stromal\_LCM.Agilent vs Stromal\_CD49.IHC, n=55

spearman = 0.25

pearson = 0.28

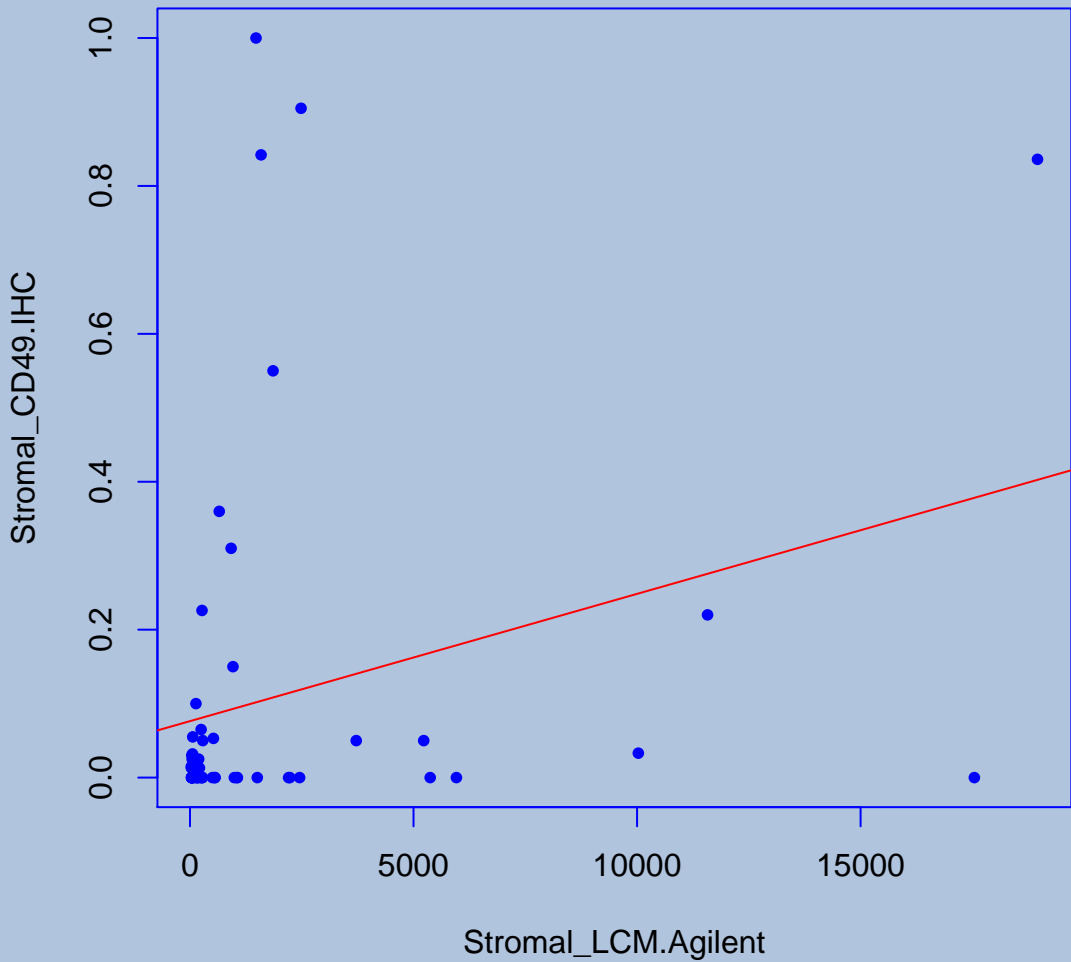

**Stromal\_LCM.mRNA vs Stromal\_CD49.mRNA, n=57**

**spearman = 0.78**

**pearson = 0.68**

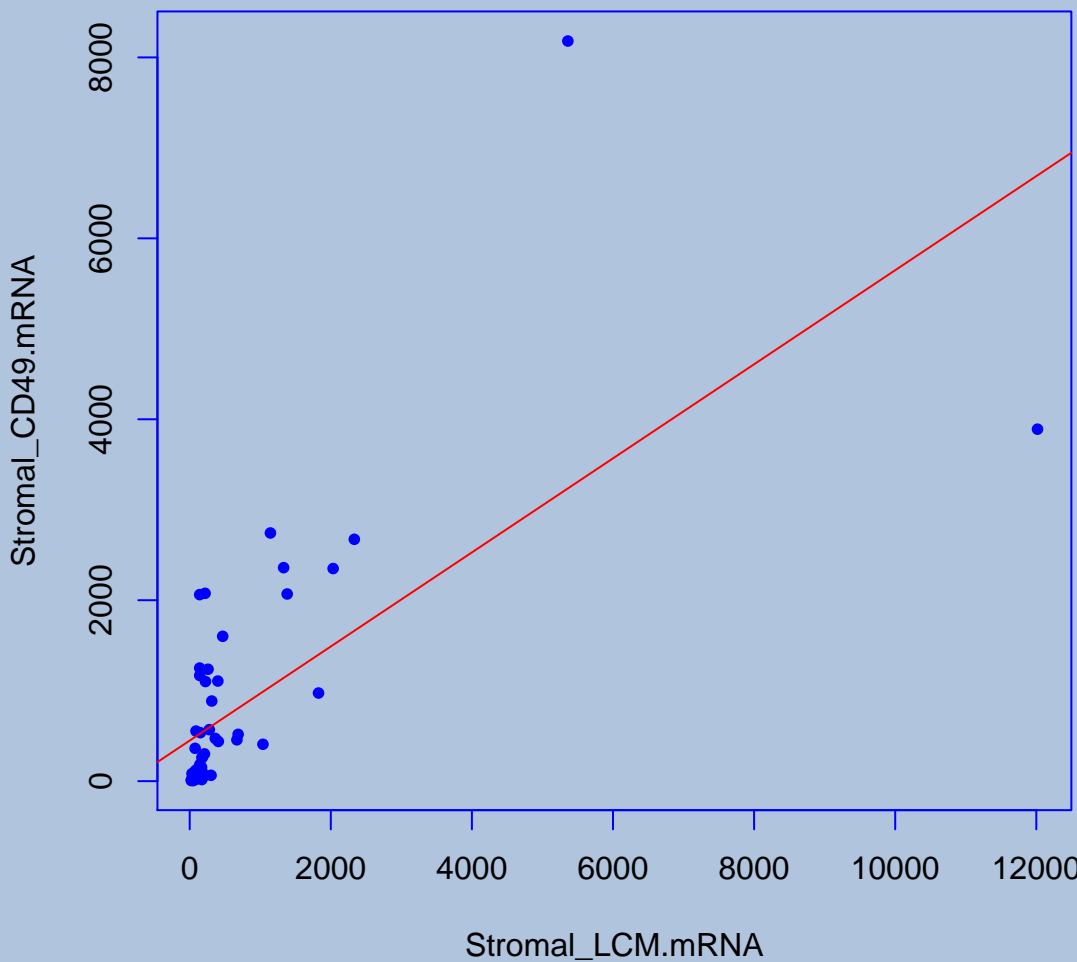

Stromal\_LCM.Agilent vs Stromal\_CD49.mRNA, n=55

spearman = 0.55

pearson = 0.65

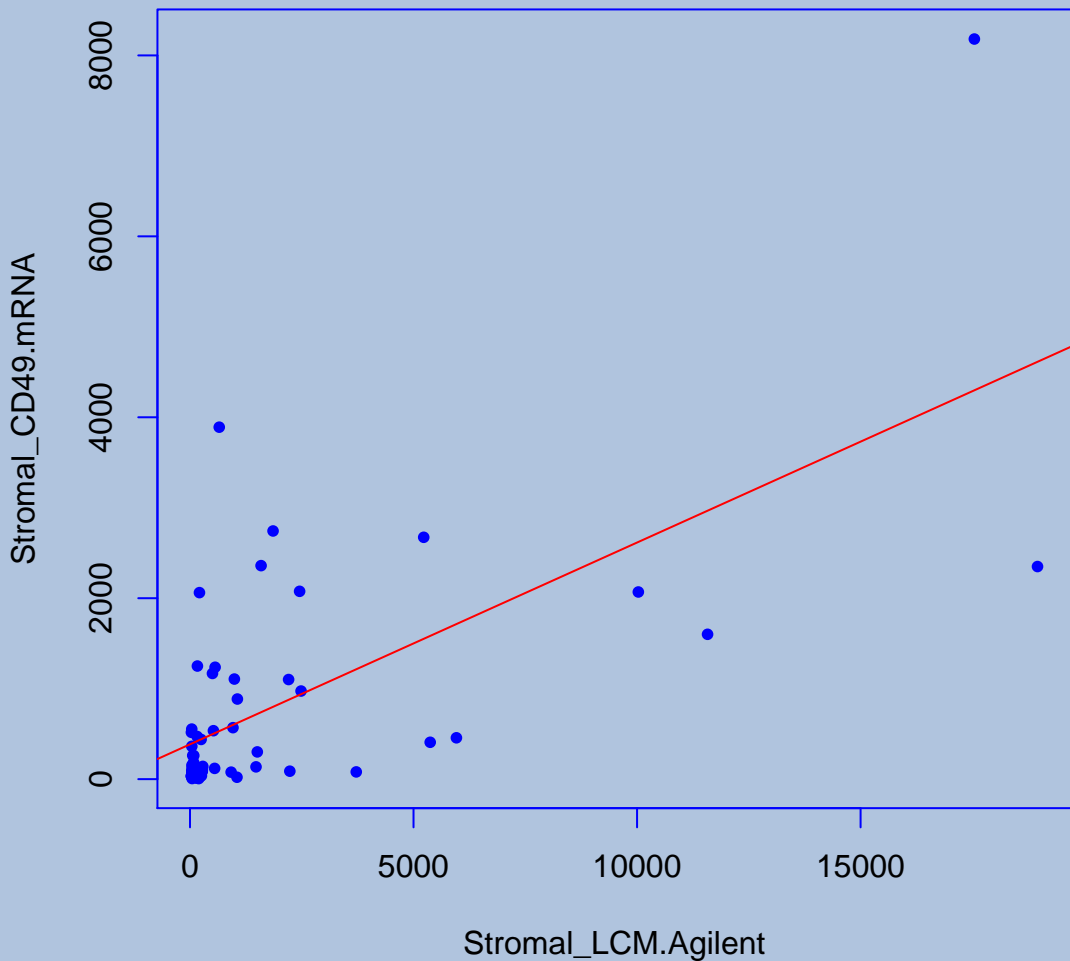

Supplement: 1471-2164-9-246-S3.pdf [file 1471-2164-9-246-S3.pdf]
